# Phenome-Wide Association Study (PheWAS) for Detection of Pleiotropy within the Population Architecture using Genomics and Epidemiology (PAGE) Network

Sarah A. Pendergrass<sup>1</sup>, Kristin Brown-Gentry<sup>2</sup>, Scott Dudek<sup>2</sup>, Alex Frase<sup>1</sup>, Eric S. Torstenson<sup>2</sup>, Robert Goodloe<sup>2</sup>, Jose Luis Ambite<sup>3</sup>, Christy L. Avery<sup>4</sup>, Steve Buyske<sup>5,6</sup>, Petra Bůžková<sup>7</sup>, Ewa Deelman<sup>3</sup>, Megan D. Fesinmeyer<sup>8</sup>, Christopher A. Haiman<sup>9</sup>, Gerardo Heiss<sup>4</sup>, Lucia A. Hindorff<sup>10</sup>, Chu-Nan Hsu<sup>3</sup>, Rebecca D. Jackson<sup>11</sup>, Charles Kooperberg<sup>8</sup>, Loic Le Marchand<sup>12</sup>, Yi Lin<sup>8,5</sup>, Tara C. Matise<sup>5</sup>, Kristine R. Monroe<sup>9</sup>, Larry Moreland<sup>13</sup>, Sungshim L. Park<sup>12</sup>, Alex Reiner<sup>8,14</sup>, Robert Wallace<sup>15</sup>, Lynn R. Wilkens<sup>12</sup>, Dana C. Crawford<sup>2,16</sup>, Marylyn D. Ritchie<sup>1\*</sup>

**1** Center for Systems Genomics, Department of Biochemistry and Molecular Biology, The Pennsylvania State University, Eberly College of Science, The Huck Institutes of the Life Sciences, University Park, Pennsylvania, United States of America, **2** Center for Human Genetics Research, Vanderbilt University, Nashville, Tennessee, United States of America, **3** Information Sciences Institute, University of Southern California, Marina del Rey, California, United States of America, **4** Department of Epidemiology, University of North Carolina, Chapel Hill, North Carolina, United States of America, **5** Department of Genetics, Rutgers University, Piscataway, New Jersey, United States of America, **6** Department of Statistics, Rutgers University, Piscataway, New Jersey, United States of America, **7** Department of Biostatistics, University of Washington, Seattle, Washington, United States of America, **8** Division of Public Health, Fred Hutchinson Cancer Research Center, Seattle, Washington, United States of America, **9** Department of Preventive Medicine, Keck School of Medicine, University of Southern California/Norris Comprehensive Cancer Center, Los Angeles, California, United States of America, **10** National Human Genome Research Institute, National Institutes of Health, Bethesda, Maryland, United States of America, **11** Ohio State University, Columbus, Ohio, United States of America, **12** Epidemiology Program, University of Hawaii Cancer Center, Honolulu, Hawaii, United States of America, **13** University of Pittsburgh, Pittsburgh, Pennsylvania, United States of America, **14** Department of Epidemiology, University of Washington, Seattle, Washington, United States of America, **15** Departments of Epidemiology and Internal Medicine, University of Iowa, Iowa City, Iowa, United States of America, **16** Department of Molecular Physiology and Biophysics, Vanderbilt University, Nashville, Tennessee, United States of America

## Abstract

Using a phenome-wide association study (PheWAS) approach, we comprehensively tested genetic variants for association with phenotypes available for 70,061 study participants in the Population Architecture using Genomics and Epidemiology (PAGE) network. Our aim was to better characterize the genetic architecture of complex traits and identify novel pleiotropic relationships. This PheWAS drew on five population-based studies representing four major racial/ethnic groups (European Americans (EA), African Americans (AA), Hispanics/Mexican-Americans, and Asian/Pacific Islanders) in PAGE, each site with measurements for multiple traits, associated laboratory measures, and intermediate biomarkers. A total of 83 single nucleotide polymorphisms (SNPs) identified by genome-wide association studies (GWAS) were genotyped across two or more PAGE study sites. Comprehensive tests of association, stratified by race/ethnicity, were performed, encompassing 4,706 phenotypes mapped to 105 phenotype-classes, and association results were compared across study sites. A total of 111 PheWAS results had significant associations for two or more PAGE study sites with consistent direction of effect with a significance threshold of  $p < 0.01$  for the same racial/ethnic group, SNP, and phenotype-class. Among results identified for SNPs previously associated with phenotypes such as lipid traits, type 2 diabetes, and body mass index, 52 replicated previously published genotype-phenotype associations, 26 represented phenotypes closely related to previously known genotype-phenotype associations, and 33 represented potentially novel genotype-phenotype associations with pleiotropic effects. The majority of the potentially novel results were for single PheWAS phenotype-classes, for example, for *CDKN2A/B* rs1333049 (previously associated with type 2 diabetes in EA) a PheWAS association was identified for hemoglobin levels in AA. Of note, however, *GALNT2* rs2144300 (previously associated with high-density lipoprotein cholesterol levels in EA) had multiple potentially novel PheWAS associations, with hypertension related phenotypes in AA and with serum calcium levels and coronary artery disease phenotypes in EA. PheWAS identifies associations for hypothesis generation and exploration of the genetic architecture of complex traits.

**Citation:** Pendergrass SA, Brown-Gentry K, Dudek S, Frase A, Torstenson ES, et al. (2013) Phenome-Wide Association Study (PheWAS) for Detection of Pleiotropy within the Population Architecture using Genomics and Epidemiology (PAGE) Network. *PLoS Genet* 9(1): e1003087. doi:10.1371/journal.pgen.1003087

**Editor:** Greg Gibson, Georgia Institute of Technology, United States of America

**Received:** June 5, 2012; **Accepted:** September 12, 2012; **Published:** January 31, 2013

This is an open-access article, free of all copyright, and may be freely reproduced, distributed, transmitted, modified, built upon, or otherwise used by anyone for any lawful purpose. The work is made available under the Creative Commons CC0 public domain dedication.

**Funding:** The Population Architecture Using Genomics and Epidemiology (PAGE) program is funded by the National Human Genome Research Institute (NHGRI), supported by U01HG004803 (CALiCo), U01HG004798 (EAGLE), U01HG004802 (MEC), U01HG004790 (WHI), and U01HG004801 (Coordinating Center), and their respective NHGRI ARRA supplements. The contents of this paper are solely the responsibility of the authors and do not necessarily represent the official views of the NIH. The complete list of PAGE members can be found at <http://www.pagestudy.org>. The data and materials included in this report result from a collaboration between the following studies: The "Epidemiologic Architecture for Genes Linked to Environment (EAGLE)" is funded through the NHGRI PAGE program (U01HG004798-01 and its NHGRI ARRA supplement). Genotyping services for select NHANES III SNPs presented here were also provided by the Johns Hopkins University under federal contract number (N01-HV-48195) from NHLBI and from the University of Washington's Center for Ecogenetics and Environmental Health

(CEEH) pilot study funded by the National Institute of Environmental Health Sciences grant 5 P30 ES007033-12. The study participants derive from the National Health and Nutrition Examination Surveys (NHANES), and these studies are supported by the Centers for Disease Control and Prevention. The findings and conclusions in this report are those of the authors and do not necessarily represent the views of the Centers for Disease Control and Prevention. The Multiethnic Cohort study (MEC) characterization of epidemiological architecture is funded through the NHGRI PAGE program (U01HG004802 and its NHGRI ARRA supplement). The MEC study is funded through the National Cancer Institute (R37CA54281, R01 CA63, P01CA33619, U01CA136792, and U01CA98758). Funding support for the "Epidemiology of putative genetic variants: The Women's Health Initiative" study is provided through the NHGRI PAGE program (U01HG004790 and its NHGRI ARRA supplement). The WHI program is funded by the National Heart, Lung, and Blood Institute; NIH; and U.S. Department of Health and Human Services through contracts N01WH22110, 24152, 32100-2, 32105-6, 32108-9, 32111-13, 32115, 32118-32119, 32122, 42107-26, 42129-32, and 44221. The authors thank the WHI investigators and staff for their dedication, and the study participants for making the program possible. A full listing of WHI investigators can be found at: [http://www.whiscience.org/publications/WHI\\_investigators\\_shortlist.pdf](http://www.whiscience.org/publications/WHI_investigators_shortlist.pdf). Funding support for the Genetic Epidemiology of Causal Variants Across the Life Course (CALiCo) program was provided through the NHGRI PAGE program (U01HG004803 and its NHGRI ARRA supplement). The following studies contributed to this manuscript and are funded by the following agencies: The Atherosclerosis Risk in Communities (ARIC) Study is carried out as a collaborative study supported by National Heart, Lung, and Blood Institute contracts N01-HC-55015, N01-HC-55016, N01-HC-55018, N01-HC-55019, N01-HC-55020, N01-HC-55021, and N01-HC-55022. The Coronary Artery Risk Development in Young Adults (CARDIA) study is supported by the following National Institutes of Health, National Heart, Lung, and Blood Institute contracts: N01-HC-95095, N01-HC-48047, N01-HC-48048, N01-HC-48049, N01-HC-48050, N01-HC-45134, N01-HC-05187, and N01-HC-45205. The Cardiovascular Health Study (CHS) is supported by contracts HHSN268201200036C, N01-HC-85239, N01-HC-85079 through N01-HC-85086, N01-HC-35129, N01 HC-15103, N01 HC-55222, N01-HC-75150, N01-HC-45133, and grant HL080295 from the National Heart, Lung, and Blood Institute (NHLBI), with additional contribution from the National Institute of Neurological Disorders and Stroke (NINDS). Additional support was provided through AG-023629, AG-15928, AG-20098, and AG-027058 from the National Institute on Aging (NIA). The Strong Heart Study (SHS) is supported by NHLBI grants U01 HL65520, U01 HL41642, U01 HL41652, U01 HL41654, and U01 HL65521. The opinions expressed in this paper are those of the author(s) and do not necessarily reflect the views of the Indian Health Service. Assistance with phenotype harmonization, SNP selection and annotation, data cleaning, data management, integration and dissemination, and general study coordination was provided by the PAGE Coordinating Center (U01HG004801-01 and its NHGRI ARRA supplement). The National Institutes of Mental Health also contributes to the support for the Coordinating Center. The funders had no role in study design, data collection and analysis, decision to publish, or preparation of the manuscript.

**Competing Interests:** The authors have declared that no competing interests exist.

\* E-mail: [marylyn.ritchie@psu.edu](mailto:marylyn.ritchie@psu.edu)

## Introduction

Phenomic approaches are complementary to the more prevalent paradigm of genome-wide association studies (GWAS), which have provided some information about the contribution of genetic variation to a wide range of diseases and phenotypes [1]. While a typical GWAS evaluates the association between the variation of hundreds of thousands, to over a million, genotyped single nucleotide polymorphisms (SNPs) and one or a few phenotypes, a common limitation of GWAS is the focus on a pre-defined and limited phenotypic domain. An alternate approach is that of PheWAS, which utilizes *all* available phenotypic information and all genetic variants in the estimation of associations between genotype and phenotype [1]. By investigating the association between SNPs and a diverse range of phenotypes, a broader picture of the relationship between genetic variation and networks of phenotypes is possible.

A challenge for PheWAS is the availability of large studies with genotypic data that are also linked to a wide array of high quality phenotypic measurements and traits for study. Biorepositories linked to electronic medical records (EMR) have been an initial resource for PheWAS, but these EMR-based studies are often limited to phenotypes and traits commonly collected for clinical use and may represent sets of limited racial/ethnic diversity [2,3]. While there is no U.S. national, population-based cohort [4], several diverse, population-based studies exist with tens of thousands of samples linked to detailed survey, laboratory, and medical data. These large population-based studies have limitations [5], but collectively [6] they offer an opportunity to perform a PheWAS of unprecedented size and diversity.

To capitalize on the potential for collaborative discovery among some of the large population-based studies of the U.S., the National Human Genome Research Institute (NHGRI) funded the Population Architecture using Genomics and Epidemiology (PAGE) network. PAGE includes eight extensively characterized, large population-based epidemiologic studies where data were collected across multiple racial/ethnic groups, supported by a coordinating center [7], providing an exceptional opportunity to pursue PheWAS with a large number of SNPs, and thousands of phenotypic measurements including a wide range of common diseases, risk factors, intermediate biomarkers and quantitative traits in diverse populations. Herein, we illustrate the feasibility and utility of the PheWAS approach for large

population-based studies and demonstrate that PheWAS provides information on, and exposes the complexity of, the relationship between genetic variation and interrelated and independent phenotypes. We have found PheWAS results that replicate previously identified genotype-phenotype associations with the exact phenotype in previous associations or closely related phenotypes, as well as a series of novel genotype-phenotype associations. This data exploration method exposes a more complete picture of the relationship between genetic variation and phenotypic outcome. PheWAS provides the unbiased, high throughput design achieved by GWAS in the genome and phenotype domains simultaneously. This approach changes the paradigm of phenotypic characterization and allows for exploratory research in both genomics and phenomics.

## Results

Data from five PAGE study sites were available for this PheWAS: Epidemiologic Architecture for Genes Linked to Environment (EAGLE) using data from the National Health and Nutrition Examination Surveys (NHANES); the Multiethnic Cohort Study (MEC); the Women's Health Initiative (WHI); and two studies of the Causal Variants Across the Life Course (CALiCo) group: the Cardiovascular Health Study (CHS) and Atherosclerosis Risk in Communities (ARIC). Text S1 provides full information on study design, phenotype measurement, and genotyping for each study. These studies collectively include four major racial/ethnic groups: European Americans (EA), African Americans (AA), Hispanics/Mexican Americans (H), and Asian/Pacific Islanders (API). All PAGE study sites included both males and females, except for WHI (which includes only women). Table 1 provides an overview of the sample sizes by PAGE study site as well as the number of SNPs and phenotypes available for this PheWAS. Sample size and the number of phenotypes varied across studies, and the sample size for various phenotypes within each study varied dependent on the number of individuals for which a given phenotype was measured. The number of phenotypes available for this PheWAS ranged within studies from 63 (MEC) to 3,363 (WHI). Study sites also had differing numbers of genotyped SNPs, and Table S1 contains the list of all SNPs available for two or more sites in this study, arranged by previously associated phenotypes. The PAGE network has focused on characterization of well-replicated variants across multiple race/

## Author Summary

In phenome-wide association studies (PheWAS) all potential genetic variants in a dataset are systematically tested for association with all available phenotypes and traits that have been measured in study participants. By investigating the relationship between genetic variation and a diversity of phenotypes, there is the potential for uncovering novel relationships between single nucleotide polymorphisms (SNPs), phenotypes, and networks of interrelated phenotypes. PheWAS also can expose pleiotropy, provide novel mechanistic insights, and foster hypothesis generation. This approach is complementary to genome-wide association studies (GWAS) that test the association between hundreds of thousands, to over a million, single nucleotide polymorphisms and a single phenotype or limited phenotypic domain. The Population Architecture using Genomics and Epidemiology (PAGE) network has measures for a wide array of phenotypes and traits, including prevalent and incident status for clinical conditions and risk factors, as well as clinical parameters and intermediate biomarkers. We performed tests of association between a series of genome-wide association study (GWAS)-identified SNPs and a comprehensive range of phenotypes from the PAGE network in a high-throughput manner. We replicated a number of previously reported associations, validating the PheWAS approach. We also identified novel genotype-phenotype associations possibly representing pleiotropic effects.

ethnicities, so each study independently genotyped a set of SNPs with previously reported associations with phenotypes such as body mass index, C-reactive protein, and lipid levels.

Tests of association assuming an additive genetic model were performed independently by each PAGE study site for each SNP and each phenotype, stratified by race/ethnicity. The last column of Table 1 presents the total number of comprehensive associations with and without a p-value cutoff of 0.01, showing the proportion of significant results for this many tests of association. The total number of tests of association ranged from >20,000

(MEC) to >1 million (WHI) reflecting the variability in both the number of phenotypes available for study as well as the number of SNPs genotyped by each PAGE study site. As expected, the total number of significant tests of association ( $p < 0.01$ ) represented a fraction of the total number of tests performed.

Results from these tests of association were then compared across study sites to identify overlapping significant associations, as these results most likely represent robust findings. To facilitate determining overlapping significant associations, similar phenotypes that existed across more than one study were binned into 105 distinct phenotype-classes. For some phenotypes, the specific phenotype existed across more than one PAGE study, such as for the phenotype “Hemoglobin”, where hemoglobin measurements were available for ARIC, CHS, EAGLE, and WHI. Other groups of phenotypes binned within phenotype-classes were within similar phenotypic domains but were not represented in exact same form across studies. Table S2 contains a list of the study level phenotypes, the study from which the phenotype is available, and the phenotype-class for each phenotype that overlapped with another study.

The same or similar phenotypes may or may not have been collected by each PAGE study. Thus, the number of studies that were available for comparison of results across studies varied from one phenotype-class to another phenotype-class. Table 2 presents the number of results where at least two of five independent studies had SNP-phenotype associations with  $p < 0.01$  for single phenotype-class and single race/ethnicity group, compared to the total number of SNP-phenotype association tests performed. For example, >8,500 tests of association for the same SNP and same phenotype were available from two PAGE study sites whereas only 906 and 58 tests of association were available from four and five PAGE study sites, respectively. There were 3 results where two or more of the groups had a SNP-phenotype association  $p < 0.01$  for a single phenotype class across 5 groups represented.

For this PAGE-wide PheWAS, tests of association were considered significant across PAGE study sites where two or more phenotypes in the same phenotype-class in the same racial/ethnic group passed a significance threshold of  $p < 0.01$  with a consistent direction of genetic effect. Based on these criteria, a total of 111

**Table 1.** Study Descriptions.

| Study <sup>1</sup> | PMID <sup>2</sup> | Age Range          | Sex | Maximum Sample Size <sup>3</sup> |       |       |       | Minimum Sample Size <sup>3</sup> |     |    |     | # SNPs <sup>4</sup> | # Phenotypes <sup>5</sup> | Total # of Tests <sup>6</sup><br>(# $p < 0.01$ ) |
|--------------------|-------------------|--------------------|-----|----------------------------------|-------|-------|-------|----------------------------------|-----|----|-----|---------------------|---------------------------|--------------------------------------------------|
|                    |                   |                    |     | EA                               | AA    | H     | API   | EA                               | AA  | H  | API |                     |                           |                                                  |
| ARIC               | [36]              | 45–64              | M/F | 11,068                           | 4,007 | NA    | NA    | 17                               | 7   | NA | NA  | 69                  | 612                       | 138,207 (2,378)                                  |
| CHS                | [37]              | 65–100 at baseline | M/F | 4,487                            | 820   | NA    | NA    | 151                              | 116 | NA | NA  | 46                  | 341                       | 34,829 (550)                                     |
| EAGLE              | [38]              | 12–95              | M/F | 2,628                            | 2,107 | 2,071 | NA    | 7                                | 16  | 15 | NA  | 236                 | 327                       | 359,508 (6,496)                                  |
| MEC                | [39]              | 45–75              | M/F | 3,893                            | 4,749 | 6,863 | 6,810 | 33                               | 27  | 40 | 13  | 74                  | 63                        | 23,310 (212)                                     |
| WHI                | [40]              | 50–79 at baseline  | F   | 13,334                           | 4,274 | 2,023 | 927   | 14                               | 5   | 7  | 5   | 94                  | 3,363                     | 1,123,366 (14,068)                               |

Abbreviations: European American (EA), African American (AA), Hispanic/Mexican American (H), Asian/Pacific Islander (API).

<sup>1</sup>Data from PAGE studies available for this PheWAS include: Atherosclerosis Risk in Communities (ARIC), Cardiovascular Health Study (CHS), Epidemiologic Architecture for Genes Linked to Environment (EAGLE), Multiethnic Cohort (MEC), and Women’s Health Initiative (WHI). PAGE study sites and study design descriptions are in Text S1.

<sup>2</sup>Pubmed ID of study description manuscript for each study.

<sup>3</sup>Maximum sample size and Minimum sample size are dependent both on who was genotyped and who had a specific phenotype measured. Not all phenotypic measurements were available for all participants within each study.

<sup>4</sup>This is the total number of SNPs available for each study. Table S1 has the list of these SNPs for each study, genotyped across two or more studies.

<sup>5</sup>This includes the number of phenotypes transformed and untransformed, as well as categorical phenotypes divided into binary phenotypes, full description in Materials and Methods.

<sup>6</sup>Total number of tests of association calculated for each study, in parenthesis is the total number of associations with  $p < 0.01$ .

doi:10.1371/journal.pgen.1003087.t001

**Table 2.** The number of SNP–Phenotype tests of association for phenotype-classes varies by PAGE study site genotype and phenotype overlap.

| Number of PAGE study sites <sup>1</sup> | Number of Total Tests of Association <sup>2</sup> | Number of Significant Tests of Association <sup>3</sup> |
|-----------------------------------------|---------------------------------------------------|---------------------------------------------------------|
| 2                                       | 8680                                              | 45                                                      |
| 3                                       | 3295                                              | 42                                                      |
| 4                                       | 906                                               | 21                                                      |
| 5                                       | 58                                                | 3*                                                      |
| Total                                   | 12939                                             | 111                                                     |

<sup>1</sup>Number of PAGE study sites where both the SNP and phenotype were available for a given phenotype class.

<sup>2</sup>Total number of tests of association, by number of PAGE study sites, where both the SNP and phenotype were available for a given phenotype class.

<sup>3</sup>Number of tests of association that was significant ( $p < 0.01$ ) for two or more PAGE study sites for a single phenotype class and SNP, taking into account matching direction of effect when phenotypically relevant.

\*Three results where two or more of the groups had a SNP–phenotype association  $p < 0.01$  for a single phenotype class across 5 groups represented. The most replicated novel results across studies were for SNPs rs599839, rs10923931, and rs2228145 with hematologic traits.

doi:10.1371/journal.pgen.1003087.t002

PheWAS associations were identified (Table S3). Overall, among the 111 significant PheWAS associations identified, 52 PheWAS results replicated previously published genotype-phenotype associations (Table S4), 26 represented phenotype-classes closely related to previously known genotype-phenotype associations (Table 3), and 33 represented novel genotype-phenotype associations (Table 4).

### Known Associations—Validating the PheWAS Approach

Almost half of the PAGE PheWAS results (52/111; 48%) replicated previously known genotype-phenotype associations. These replicated results serve as positive controls and demonstrate that the high-throughput PheWAS approach is feasible and valid. As an example, low-density lipoprotein cholesterol (LDL-C) has previously been associated with rs4420638 near *APOE/APOC1/C1P1/C2/CA* in European Americans [8,9]. In the PAGE PheWAS, a significant association between the same SNP and LDL-C phenotypes of the “LDL-C” phenotype-class in European Americans as reported in the literature [8,9] was observed in two PAGE study sites, with the same direction of effect ( $\beta$ ) as well as a third PAGE site with near significant results: ARIC ( $p = 1.27 \times 10^{-15}$ ,  $\beta = -5.75$ ), CHS ( $p = 7.89 \times 10^{-12}$ ,  $\beta = -7.06$ ), and WHI ( $p = 0.06$ ,  $\beta = -4.15$ ). Figure 1 shows the significant PheWAS LDL-C results, as well as other associations considered significant for rs4420638 across PAGE study sites for other phenotype-classes in a similar racial/ethnic group passed a significance threshold of  $p < 0.01$  with a consistent direction of genetic effect.

### Related Associations

Approximately one-fourth of the PAGE PheWAS results (26/111; 23%) represented SNP-phenotype associations in phenotype-classes closely related to previously known genotype-phenotype associations. For example, rs10757278 near *CDKN2A/CDKN2B* has been robustly associated with myocardial infarction (MI) [10,11]. In this PheWAS, rs10757278 was associated with the “Cardiac” phenotype-class, but also with the related phenotype-classes of “Artery Treatment” and “Angina”. Specifically, rs10757278 was associated with phenotypes in the Artery Treatment phenotype-class, such as “percutaneous transluminal coronary angioplasty” (WHI,  $p = 2.86 \times 10^{-6}$ ,  $\beta = -0.17$ , EA), and “coronary bypass surgery” (CHS,  $p = 9.60 \times 10^{-3}$ ,  $\beta = -0.26$ , EA). The SNP rs10757278 was also associated with phenotypes in the Angina phenotype-class, such as presence or absence of angina (WHI,  $p = 6.59 \times 10^{-3}$ ,  $\beta = -0.14$ , EA) and the phenotype “Ever

see a doctor because of chest pain?” (ARIC,  $p = 4.44 \times 10^{-3}$ ,  $\beta = -0.31$ , EA). Replication of association of this SNP with previously known phenotypes were also found with the phenotype-class “Cardiac”, with phenotypes such as “MI (Y/N)” (WHI,  $p = 1.39 \times 10^{-4}$ ,  $\beta = -0.11$ , EA), and “MI status at baseline (Y/N)” (CHS,  $p = 6.35 \times 10^{-3}$ ,  $\beta = -0.18$ , EA). Significant PheWAS associations at  $p < 0.01$  for rs10757278 are plotted by phenotype in Figure 2, as well as additional results at  $p < 0.05$ .

Another example of PheWAS associations for phenotype-classes closely related to known genotype-phenotype associations existed for rs599839 near the *CELSR2/PSRC1/SORT1* gene cluster. The SNP rs599839 has been associated with serum LDL cholesterol levels [8,12–14], and coronary artery disease [13,15]. In our PheWAS, associations were found for the “LDL-C” phenotype-class, as well the coronary artery disease related “Angina” and lipid related “HDL-C” phenotype-classes, including specific phenotypes such as “angina, presence or absence of” (WHI,  $p = 2.10 \times 10^{-4}$ ,  $\beta = 0.25$ , EA), and “HDL-C” (WHI,  $p = 1.23 \times 10^{-3}$ ,  $\beta = -0.04$ , AA). As expected, a significant association was also identified for the LDL-C level related phenotype “LDL-C (mg/dl)” (ARIC,  $p = 5.25 \times 10^{-22}$ ,  $\beta = 6.42$  EA). Significant PheWAS associations at  $p < 0.01$  for rs599839 are plotted by phenotype in Figure 3, as well as additional results at  $p < 0.05$ .

### Potentially Novel Associations

PheWAS results were considered novel, if the significant phenotype-class associations varied substantially from the previously reported GWAS and candidate gene studies. Approximately one-third of the PAGE PheWAS results (33/111; 30%) represented novel genotype-phenotype-class associations. Further research will be required to determine the further validity of these exploratory results.

The most statistically significant of the novel phenotype-class associations identified by this PheWAS include multiple associations involving phenotype-classes for hematologic traits in African Americans (Figure 4). SNPs rs599839 (*CELSR2/PSRC1*), rs10923931 (*NOTCH2*), rs2228145 (*IL6R*), rs2144300 (*GALNT2*), rs10757278 (*CDKN2A,CDKN2B*), and rs7901695 (*TCF7L2*) were each associated with white blood cell count phenotypes among AA (significant p-values ranging  $7.96 \times 10^{-3}$  to  $9.99 \times 10^{-15}$ ). *IL6R* rs2228145 was also associated with neutrophils and lymphocyte numbers in AA with p-values ranging from  $2.44 \times 10^{-4}$  to  $4.66 \times 10^{-10}$ . These SNPs were previously associated with LDL-C, total cholesterol levels, and coronary artery disease (rs599839)

**Table 3.** PheWAS Tests of Association: Related Associations.

| Nearest Gene   | SNP ID     | CA <sup>1</sup> , (CAF <sup>2</sup> ) | Associated Phenotype Class <sup>4</sup> | Phenotypes <sup>3</sup>                      | Ethnicity <sup>5</sup> | P-Values <sup>6</sup> | Beta(SE) <sup>7</sup> | Sample Size <sup>8</sup> | Substudies <sup>9</sup> | Substudy Count <sup>10</sup> | Previously Associated Phenotype <sup>11</sup>               | References <sup>12</sup>                         |
|----------------|------------|---------------------------------------|-----------------------------------------|----------------------------------------------|------------------------|-----------------------|-----------------------|--------------------------|-------------------------|------------------------------|-------------------------------------------------------------|--------------------------------------------------|
| CELSR2, PSRC1  | RS599839   | A (0.8)                               | ANGINA                                  | Ever hospitalized for chest pain? (Y/N)      | EA                     | 2.57e-3               | 0.55(0.18)            | 568                      | ARIC                    | 3                            | Coronary Artery Disease, LDL cholesterol, Total cholesterol | 18262040, 18193043, 18179892, 17634449, 18193044 |
|                |            |                                       |                                         | Angina status at baseline (Y/N)              |                        | 8.79e-3               | 0.21(0.08)            | 4482                     | CHS                     |                              |                                                             |                                                  |
|                |            |                                       |                                         | Angina (Y/N)                                 |                        | 2.10e-4               | 0.25(0.07)            | 13308                    | WHI                     |                              |                                                             |                                                  |
|                |            |                                       |                                         | Ever had pain/discomfort in your chest (Y/N) |                        | 1.06e-4               | 0.21(0.05)            | 4477                     | CHS                     |                              |                                                             |                                                  |
| CDKN2A, CDKN2B | RS1333049  | C (0.5)                               | ANGINA                                  | Chest pain or discomfort? (Y/N)              | EA                     | 4.69e-3               | 0.08(0.03)            | 9338                     | ARIC                    | 3                            | Coronary Artery Disease, Type 2 Diabetes, Hypertension      | 17554300, 17634449                               |
|                |            |                                       |                                         | See a doctor, because of chest pain? (Y/N)   |                        | 8.80e-3               | 0.32(0.12)            | 572                      | ARIC                    |                              |                                                             |                                                  |
|                |            |                                       |                                         | Ever had pain/discomfort in your chest (Y/N) |                        | 9.72e-3               | 0.11(0.04)            | 4472                     | CHS                     |                              |                                                             |                                                  |
|                |            |                                       |                                         | Angina (Y/N)                                 |                        | 7.75e-3               | 0.14(0.05)            | 13331                    | WHI                     |                              |                                                             |                                                  |
| LPL            | RS6586891  | A (0.6)                               | Serum Triglycerides                     | LN1 Total triglycerides in mmol/l            | EA                     | 7.76e-7               | -0.02(4.75e-3)        | 9326                     | ARIC                    | 3                            | HDL Cholesterol                                             | 18193043                                         |
|                |            |                                       |                                         | Triglyceride (mg/dl)                         |                        | 3.45e-3               | -5.18(1.77)           | 4469                     | CHS                     |                              |                                                             |                                                  |
|                |            |                                       |                                         | LN1 core triglyceride (mg/dl)                |                        | 6.68e-3               | -0.06(0.02)           | 922                      | WHI                     |                              |                                                             |                                                  |
|                |            |                                       |                                         | Total Triglycerides (mmol/l)                 |                        | 3.50e-4               | -0.06(0.02)           | 9326                     | ARIC                    |                              |                                                             |                                                  |
|                |            |                                       |                                         | LN1 Triglycerides (mg/dl)                    |                        | 2.45e-3               | -0.03(9.65e-3)        | 4469                     | CHS                     |                              |                                                             |                                                  |
|                |            |                                       |                                         | Ever had pain/discomfort in your chest (Y/N) |                        | 5.96e-3               | -0.12(0.04)           | 4474                     | CHS                     | 3                            | Myocardial infarction                                       |                                                  |
| CDKN2A, CDKN2B | RS10757278 | A (0.5)                               | ANGINA                                  | Angina (Y/N)                                 |                        | 6.59e-3               | -0.14(0.05)           | 13313                    | WHI                     |                              |                                                             |                                                  |
|                |            |                                       |                                         | Chest pain or discomfort? (Y/N)              |                        | 9.73e-3               | -0.07(0.03)           | 11047                    | ARIC                    |                              |                                                             |                                                  |
|                |            |                                       |                                         | See a doc because of chest pain? (Y/N)       |                        | 4.44e-3               | -0.31(0.11),          | 722                      | ARIC                    |                              |                                                             |                                                  |
|                |            |                                       |                                         | Rose angina (Y/N)                            |                        | 8.17e-3               | 0.16(0.06)            | 11040                    | ARIC                    |                              |                                                             |                                                  |
| LDLR           | RS6511720  | G (0.9)                               | Serum Cholesterol                       | Total cholesterol (mmol/l)                   | EA                     | 6.84e-16              | 0.18(0.02)            | 10891                    | ARIC                    | 2                            | LDL Cholesterol                                             | 18193043                                         |
|                |            |                                       |                                         | Total cholesterol (mg/dl)                    |                        | 2.64e-5               | 12.05(2.85)           | 924                      | WHI                     |                              |                                                             |                                                  |
|                |            |                                       |                                         | LN1 Total cholesterol (mmol/l)               |                        | 4.15e-17              | 0.03(3.30e-3)         | 10891                    | ARIC                    |                              |                                                             |                                                  |
|                |            |                                       |                                         | High cholesterol requiring pills ever (Y/N)  |                        | 10.00e-12             | 0.42(0.06)            | 12431                    | WHI                     |                              |                                                             |                                                  |

**Table 3. Cont.**

| Nearest Gene              | SNP ID     | CA <sup>1</sup> (CAF <sup>2</sup> ) | Phenotypes <sup>3</sup>                         | Associated Phenotype Class <sup>4</sup> | Ethnicity <sup>5</sup> | P-Values <sup>6</sup> | Beta(SE) <sup>7</sup>  | Sample Size <sup>8</sup> | Substudies <sup>9</sup> | Count <sup>10</sup> | Previously Associated Phenotype <sup>11</sup>                                                                                                                              | References <sup>12</sup>                                             |
|---------------------------|------------|-------------------------------------|-------------------------------------------------|-----------------------------------------|------------------------|-----------------------|------------------------|--------------------------|-------------------------|---------------------|----------------------------------------------------------------------------------------------------------------------------------------------------------------------------|----------------------------------------------------------------------|
|                           |            |                                     | LN1 Total cholesterol (mg/dl)                   |                                         |                        | 1.87e-5               | 0.05(0.01)             | 924                      | WHI                     |                     |                                                                                                                                                                            |                                                                      |
| PCSK9                     | RS11591147 | G (0.99)                            | Total cholesterol (mmol/l)                      | Serum Cholesterol                       | EA                     | 1.13e-16              | 0.46(0.06)             | 10833                    | ARIC                    | 2                   | LDL Cholesterol, lipids                                                                                                                                                    | 18193044                                                             |
|                           |            |                                     | Total cholesterol (mg/dl)                       |                                         |                        | 8.47e-3               | 18.62(7.06)            | 924                      | WHI                     |                     |                                                                                                                                                                            |                                                                      |
|                           |            |                                     | LN1 total cholesterol (mg/dl)                   |                                         |                        | 4.67e-3               | 0.09(0.03)             | 924                      | WHI                     |                     |                                                                                                                                                                            |                                                                      |
|                           |            |                                     | High cholesterol requiring pills ever (Y/N)     |                                         |                        | 4.72e-6               | 0.92(0.20)             | 12419                    | WHI                     |                     |                                                                                                                                                                            |                                                                      |
|                           |            |                                     | LN1 total cholesterol (mmol/l)                  |                                         |                        | 1.59e-18              | 0.07(8.39e-3)          | 10833                    | ARIC                    |                     |                                                                                                                                                                            |                                                                      |
| APOE, APOC1, APOC4, APOC2 | RS4420638  | A (0.8)                             | High cholesterol requiring pills ever (Y/N)     | Serum Cholesterol                       | EA                     | 1.18e-6               | -0.22(0.04)            | 12430                    | WHI                     | 2                   | LDL Cholesterol, lipids, Alzheimer's disease, Coronary Artery Disease, C-reactive protein, Sporadic late onset Alzheimer's disease, Apob, Triglycerides, Total cholesterol | 17474819, 17463246, 18193043, 18802019, 17998437, 19197348, 19567438 |
|                           |            |                                     | Total cholesterol (mmol/l)                      |                                         |                        | 2.31e-12              | -0.14(0.02)            | 9323                     | ARIC                    |                     |                                                                                                                                                                            |                                                                      |
|                           |            |                                     | LN1 Total cholesterol (mmol/l)                  |                                         |                        | 1.96e-13              | -0.02(3.00e-3)         | 9323                     | ARIC                    |                     |                                                                                                                                                                            |                                                                      |
|                           |            |                                     | High cholesterol requiring pills ever (Y/N)     |                                         |                        | 1.18e-6               | -0.22(0.04)            | 12430                    | WHI                     |                     |                                                                                                                                                                            |                                                                      |
|                           |            |                                     | Total cholesterol (mmol/l)                      |                                         |                        | 2.31e-12              | -0.14(0.02)            | 9323                     | ARIC                    |                     |                                                                                                                                                                            |                                                                      |
|                           |            |                                     | LN1 Total cholesterol (mmol/l)                  |                                         |                        | 1.96e-13              | -0.02 (3.00e-3)        | 9323                     | ARIC                    |                     |                                                                                                                                                                            |                                                                      |
|                           |            |                                     | Hip circumference cm                            | Hip Circumference                       | EA                     | 5.99e-3               | 0.62(0.22)             | 4456                     | CHS                     | 2                   | Body Mass Index                                                                                                                                                            | 19079261                                                             |
|                           |            |                                     | Hip circumference cm                            |                                         |                        | 7.12e-3               | 0.59(0.22)             | 13272                    | WHI                     |                     |                                                                                                                                                                            |                                                                      |
|                           |            |                                     | LN1 hip circumference cm                        |                                         |                        | 6.85e-3               | 5.84e-3(2.16e-3)/4456  |                          | CHS                     |                     |                                                                                                                                                                            |                                                                      |
|                           |            |                                     | LN1 hip circumference cm                        |                                         |                        | 3.93e-3               | 5.60e-3(1.94e-3)/13272 |                          | WHI                     |                     |                                                                                                                                                                            |                                                                      |
|                           |            |                                     | High blood pressure ever diagnosed?             | Hypertension                            | AA                     | 7.69e-3               | 0.19(0.07)             | 3946                     | ARIC                    | 2                   | Body Mass Index                                                                                                                                                            | 19079261                                                             |
|                           |            |                                     | Pills for hypertension now (Y/N)                |                                         |                        | 7.17e-3               | 0.18(0.07)             | 4122                     | WHI                     |                     |                                                                                                                                                                            |                                                                      |
|                           |            |                                     | Hypertension category: never hypertensive (Y/N) |                                         |                        | 1.03e-3               | -0.22(0.07)            | 4076                     | WHI                     |                     |                                                                                                                                                                            |                                                                      |
|                           |            |                                     | Hypertension ever (Y/N)                         |                                         |                        | 5.85e-4               | 0.23(0.07)             | 4206                     | WHI                     |                     |                                                                                                                                                                            |                                                                      |
|                           |            |                                     | Pills for hypertension ever (Y/N)               |                                         |                        | 6.30e-3               | 0.19(0.07)             | 4186                     | WHI                     |                     |                                                                                                                                                                            |                                                                      |

**Table 3. Cont.**

| Nearest Gene               | SNP ID    | CA <sup>1</sup> , (CAF <sup>2</sup> ) | Phenotypes <sup>3</sup>                              | Associated Phenotype Class <sup>4</sup> | Ethnicity <sup>5</sup> | P-Values <sup>6</sup> | Beta(SE) <sup>7</sup> | Sample Size <sup>8</sup> | Substudies <sup>9</sup> | Substudy Count <sup>10</sup> | Previously Associated Phenotype <sup>11</sup>               | References <sup>12</sup>                         |           |                         |                            |                              |                        |                          |                                        |                              |
|----------------------------|-----------|---------------------------------------|------------------------------------------------------|-----------------------------------------|------------------------|-----------------------|-----------------------|--------------------------|-------------------------|------------------------------|-------------------------------------------------------------|--------------------------------------------------|-----------|-------------------------|----------------------------|------------------------------|------------------------|--------------------------|----------------------------------------|------------------------------|
|                            |           |                                       |                                                      |                                         |                        |                       |                       |                          |                         |                              |                                                             |                                                  | WaistSize | WaistCircumference (cm) | LN1 waist circumference cm | LN1 waist circumference (cm) | Waist circumference cm | HDL cholesterol in mg/dl | LN1 high-density lipoprotein-3 (mg/dl) | LN1 HDL Cholesterol in mg/dl |
|                            |           |                                       | Hypertension category: treated hypertensive (Y/N)    |                                         |                        | 6.54e-3               | 0.19(0.07)            | 4076                     | WHI                     |                              |                                                             |                                                  |           |                         |                            |                              |                        |                          |                                        |                              |
| FTO                        | RS3751812 | T (0.4)                               | Waist circumference (cm)                             | WaistSize                               | EA                     | 3.88e-3               | 1.33(0.46)            | 2360                     | EAGLEIII                | 2                            | Body Mass Index                                             | 17658951                                         |           |                         |                            |                              |                        |                          |                                        |                              |
|                            |           |                                       | LN1 waist circumference cm                           |                                         |                        | 3.68e-8               | 0.01(1.99e-3)         | 13282                    | WHI                     |                              |                                                             |                                                  |           |                         |                            |                              |                        |                          |                                        |                              |
|                            |           |                                       | LN1 waist circumference (cm)                         |                                         |                        | 2.73e-3               | 0.01(4.99e-3)         | 2360                     | EAGLEIII                |                              |                                                             |                                                  |           |                         |                            |                              |                        |                          |                                        |                              |
|                            |           |                                       | Waist circumference cm                               |                                         |                        | 2.32e-8               | 1.03(0.18)            | 13282                    | WHI                     |                              |                                                             |                                                  |           |                         |                            |                              |                        |                          |                                        |                              |
| CELSR2, PSRC1              | RS599839  | A (0.3)                               | Re-calibrated HDL(3) cholesterol in mg/dl            | HDL                                     | AA                     | 3.07e-3               | -1.00(0.34)           | 3023                     | ARIC                    | 2                            | Coronary Artery Disease, LDL cholesterol, Total cholesterol | 18262040, 18193043, 18179892, 17634449, 18193044 |           |                         |                            |                              |                        |                          |                                        |                              |
|                            |           |                                       | LN1 high-density lipoprotein-3 (mg/dl)               |                                         |                        | 2.55e-3               | -0.03(9.54e-3)        | 974                      | WHI                     |                              |                                                             |                                                  |           |                         |                            |                              |                        |                          |                                        |                              |
|                            |           |                                       | LN1 HDL Cholesterol in mg/dl                         |                                         |                        | 4.60e-3               | -0.02(8.74e-3)        | 3024                     | ARIC                    |                              |                                                             |                                                  |           |                         |                            |                              |                        |                          |                                        |                              |
|                            |           |                                       | High-density lipoprotein-2 (mg/dl)                   |                                         |                        | 2.94e-3               | -1.09(0.36)           | 974                      | WHI                     |                              |                                                             |                                                  |           |                         |                            |                              |                        |                          |                                        |                              |
|                            |           |                                       | LN1 re-calibrated HDL(3) cholesterol in mg/dl        |                                         |                        | 2.06e-3               | -0.03(9.10e-3)        | 3023                     | ARIC                    |                              |                                                             |                                                  |           |                         |                            |                              |                        |                          |                                        |                              |
|                            |           |                                       | HDL cholesterol (mg/dl)                              |                                         |                        | 1.51e-3               | -2.20(0.69)           | 982                      | WHI                     |                              |                                                             |                                                  |           |                         |                            |                              |                        |                          |                                        |                              |
|                            |           |                                       | LN1 high-density lipoprotein-2 (mg/dl)               |                                         |                        | 2.43e-3               | -0.06(0.02)           | 974                      | WHI                     |                              |                                                             |                                                  |           |                         |                            |                              |                        |                          |                                        |                              |
|                            |           |                                       | LN1 HDL cholesterol (mg/dl)                          |                                         |                        | 1.23e-3               | -0.04(0.01)           | 982                      | WHI                     |                              |                                                             |                                                  |           |                         |                            |                              |                        |                          |                                        |                              |
|                            |           |                                       | High-density lipoprotein-3 (mg/dl)                   |                                         |                        | 2.70e-3               | -1.20(0.40)           | 974                      | WHI                     |                              |                                                             |                                                  |           |                         |                            |                              |                        |                          |                                        |                              |
| CDKN2A, CDKN2              | RS1333049 | C (0.5)                               | Percutaneous transluminal coronary angioplasty (Y/N) | Artery Treatment                        | EA                     | 2.93e-6               | 0.17(0.04)            | 13331                    | WHI                     | 2                            | Coronary Artery Disease, Type 2 Diabetes, Hypertension      | 17554300, 17634449                               |           |                         |                            |                              |                        |                          |                                        |                              |
|                            |           |                                       | Coronary bypass surgery (Y/N)                        |                                         |                        | 6.61e-3               | 0.28(0.10)            | 4446                     | CHS                     |                              |                                                             |                                                  |           |                         |                            |                              |                        |                          |                                        |                              |
| CDKN2A, CDKN2B             | RS1333049 | C (0.5)                               | Myocardial infarction status at baseline (Y/N)       | Cardiac                                 | EA                     | 8.24e-3               | 0.17(0.06)            | 4477                     | CHS                     | 2                            | Coronary Artery Disease, Type 2 Diabetes, Hypertension      | 17554300, 17634449                               |           |                         |                            |                              |                        |                          |                                        |                              |
|                            |           |                                       | Myocardial infarction (Incident or Prevalent)        |                                         |                        | 2.03e-3               | 0.22(0.07)            | 4477                     | CHS                     |                              |                                                             |                                                  |           |                         |                            |                              |                        |                          |                                        |                              |
|                            |           |                                       | Myocardial infarction (Y/N)                          |                                         |                        | 8.78e-5               | 0.11(0.03)            | 13331                    | WHI                     |                              |                                                             |                                                  |           |                         |                            |                              |                        |                          |                                        |                              |
| APOA1, APOC3, APOA4, APOA5 | RS964184  | G (0.3)                               | LN1 serum cholesterol (mg/dl)                        | Serum Cholesterol                       | MA                     | 2.18e-3               | 0.02(7.61e-3)         | 2034                     | EAGLEIII                | 2                            | HDL Cholesterol, lipids, Triglycerides, Triglyceride levels | 18193043                                         |           |                         |                            |                              |                        |                          |                                        |                              |

**Table 3. Cont.**

| Nearest Gene               | SNP ID    | CA <sup>1</sup> , (CAF <sup>2</sup> ) | Phenotypes <sup>3</sup>                     | Associated Phenotype Class <sup>4</sup> | Ethnicity <sup>5</sup> | P-Values <sup>6</sup> | Beta(SE) <sup>7</sup> | Sample Size <sup>8</sup> | Substudies <sup>9</sup> | Substudy Count <sup>10</sup> | Previously Associated Phenotype <sup>11</sup>               | References <sup>12</sup> |
|----------------------------|-----------|---------------------------------------|---------------------------------------------|-----------------------------------------|------------------------|-----------------------|-----------------------|--------------------------|-------------------------|------------------------------|-------------------------------------------------------------|--------------------------|
|                            |           |                                       | LN1 serum cholesterol (mmol/l)              |                                         |                        | 2.91e-3               | 0.02(6.36e-3)         | 2040                     | EAGLEIII                |                              |                                                             |                          |
|                            |           |                                       | Serum cholesterol (mmol/l)                  |                                         |                        | 2.50e-3               | 0.12(0.04)            | 2034                     | EAGLEIII                |                              |                                                             |                          |
|                            |           |                                       | High cholesterol requiring pills ever (Y/N) |                                         |                        | 3.39e-3               | 0.29(0.10)            | 1859                     | WHI                     |                              |                                                             |                          |
|                            |           |                                       | Serum cholesterol (mmol/l)                  |                                         |                        | 3.44e-3               | 0.12(0.04)            | 2040                     | EAGLEIII                |                              |                                                             |                          |
|                            |           |                                       | LN1 serum cholesterol (mg/dl)               |                                         |                        | 2.98e-3               | 0.02(7.64e-3)         | 2040                     | EAGLEIII                |                              |                                                             |                          |
|                            |           |                                       | Serum cholesterol (mg/dl)                   |                                         |                        | 3.42e-3               | 4.50(1.53)            | 2040                     | EAGLEIII                |                              |                                                             |                          |
|                            |           |                                       | LN1 serum cholesterol: si (mmol/l)          |                                         |                        | 2.10e-3               | 0.02(6.35e-3)         | 2034                     | EAGLEIII                |                              |                                                             |                          |
|                            |           |                                       | Serum cholesterol (mg/dl)                   |                                         |                        | 2.50e-3               | 4.64(1.53)            | 2034                     | EAGLEIII                |                              |                                                             |                          |
| APOA1, APOC3, APOA4, APOA5 | RS964184  | G (0.1)                               | LN1 total cholesterol (mg/dl)               | Serum Cholesterol                       | EA                     | 1.53e-3               | 0.03(0.01)            | 924                      | WHI                     | 2                            | HDL Cholesterol, lipids, Triglycerides, Triglyceride levels | 18193043                 |
|                            |           |                                       | Total cholesterol (mg/dl)                   |                                         |                        | 3.02e-3               | 7.46(2.51)            | 924                      | WHI                     |                              |                                                             |                          |
|                            |           |                                       | Serum cholesterol (mmol/l)                  |                                         |                        | 8.29e-3               | 0.13(0.05)            | 2592                     | EAGLEIII                |                              |                                                             |                          |
|                            |           |                                       | High cholesterol requiring pills ever (Y/N) |                                         |                        | 2.06e-14              | 0.35(0.05)            | 12433                    | WHI                     |                              |                                                             |                          |
|                            |           |                                       | Serum cholesterol (mg/dl)                   |                                         |                        | 8.28e-3               | 4.89(1.85)            | 2592                     | EAGLEIII                |                              |                                                             |                          |
| TM6D4, HAVCR1              | RS1501908 | C (0.6)                               | LN1 serum cholesterol (mmol/l)              | Serum Cholesterol                       | EA                     | 9.63e-3               | 0.01(5.48e-3)         | 2582                     | EAGLEIII                | 2                            | LDL Cholesterol                                             | 19060906                 |
|                            |           |                                       | LN1 total cholesterol in mmol/l             |                                         |                        | 4.04e-4               | 8.64e-3(2.44e-3)      | 9323                     | ARIC                    |                              |                                                             |                          |
|                            |           |                                       | Serum cholesterol (mmol/l)                  |                                         |                        | 9.35e-3               | 0.09(0.03)            | 2584                     | EAGLEIII                |                              |                                                             |                          |
|                            |           |                                       | Serum cholesterol (mg/dl)                   |                                         |                        | 9.40e-3               | 3.45(1.33)            | 2584                     | EAGLEIII                |                              |                                                             |                          |
|                            |           |                                       | Total cholesterol in mmol/l                 |                                         |                        | 7.27e-4               | 0.05(0.02)            | 9323                     | ARIC                    |                              |                                                             |                          |
|                            |           |                                       | LN1 serum cholesterol (mmol/l)              |                                         |                        | 8.93e-3               | 0.01(5.43e-3)         | 2584                     | EAGLEIII                |                              |                                                             |                          |
|                            |           |                                       | LN1 serum cholesterol (mg/dl)               |                                         |                        | 9.83e-3               | 0.02(6.52e-3)         | 2582                     | EAGLEIII                |                              |                                                             |                          |
|                            |           |                                       | LN1 serum cholesterol (mg/dl)               |                                         |                        | 9.17e-3               | 0.02(6.49e-3)         | 2584                     | EAGLEIII                |                              |                                                             |                          |
| LDLR                       | RS6511720 | G (0.9)                               | Total cholesterol in mmol/l                 | Serum Cholesterol                       | AA                     | 1.50e-10              | 0.25(0.04)            | 3786                     | ARIC                    | 2                            | LDL Cholesterol                                             | 18193043                 |



Table 3. Cont.

| Nearest Gene              | SNP ID     | CA <sup>1</sup> , (CAF <sup>2</sup> ) | Associated Phenotype Class <sup>4</sup> | Phenotypes <sup>3</sup>                              | Ethnicity <sup>5</sup> | P-Values <sup>6</sup> | Beta(SE) <sup>7</sup> | Sample Size <sup>8</sup> | Substudies <sup>9</sup> | Substudy Count <sup>10</sup> | Previously Associated Phenotype <sup>11</sup>                                                                                                                              | References <sup>12</sup>                                                       |
|---------------------------|------------|---------------------------------------|-----------------------------------------|------------------------------------------------------|------------------------|-----------------------|-----------------------|--------------------------|-------------------------|------------------------------|----------------------------------------------------------------------------------------------------------------------------------------------------------------------------|--------------------------------------------------------------------------------|
|                           |            |                                       |                                         | LN1 total cholesterol (mg/dl)                        |                        | 8.37e-4               | 0.04(0.01)            | 1009                     | WHI                     |                              |                                                                                                                                                                            |                                                                                |
|                           |            |                                       |                                         | High cholesterol requiring pills ever (Y/N)          |                        | 2.21e-3               | 0.31(0.10)            | 4041                     | WHI                     |                              |                                                                                                                                                                            |                                                                                |
|                           |            |                                       |                                         | Total cholesterol (mg/dl)                            |                        | 1.36e-3               | 8.31(2.59)            | 1009                     | WHI                     |                              |                                                                                                                                                                            |                                                                                |
|                           |            |                                       |                                         | LN1 total cholesterol in mmol/l                      |                        | 6.45e-11              | 0.04(5.85e-3)         | 3786                     | ARIC                    |                              |                                                                                                                                                                            |                                                                                |
| ABCG8                     | RS6544713  | C (0.7)                               | Serum Cholesterol                       | High cholesterol requiring pills ever (Y/N)          | EA                     | 7.94e-5               | -0.14(0.04)           | 12438                    | WHI                     | 2                            | LDL Cholesterol                                                                                                                                                            | 19060906                                                                       |
|                           |            |                                       |                                         | Total cholesterol in mmol/l                          |                        | 2.23e-9               | -0.09(0.02)           | 10826                    | ARIC                    |                              |                                                                                                                                                                            |                                                                                |
|                           |            |                                       |                                         | LN1 total cholesterol in mmol/l                      |                        | 2.13e-9               | -0.01(2.34e-3)        | 10826                    | ARIC                    |                              |                                                                                                                                                                            |                                                                                |
| APOB                      | RS754523   | T (0.7)                               | Serum Cholesterol                       | LN1 total cholesterol in mmol/l                      | EA                     | 3.01e-10              | -0.02(2.49e-3)        | 9314                     | ARIC                    | 2                            | LDL Cholesterol                                                                                                                                                            | 19750184                                                                       |
|                           |            |                                       |                                         | High cholesterol requiring pills ever (Y/N)          |                        | 4.76e-4               | -0.13(0.04)           | 12427                    | WHI                     |                              |                                                                                                                                                                            |                                                                                |
|                           |            |                                       |                                         | Total cholesterol in mmol/l                          |                        | 5.52e-10              | -0.10(0.02)           | 9314                     | ARIC                    |                              |                                                                                                                                                                            |                                                                                |
| APOE, APOC1, APOC4, APOC2 | RS4420638  | A (0.8)                               | Cholesterol MG                          | LN1 dietary cholesterol (mg) (dietary consumption)   | EA                     | 1.48e-3               | 0.03(9.34e-3)         | 9194                     | ARIC                    | 2                            | LDL Cholesterol, lipids, Alzheimer's disease, Coronary Artery Disease, C-reactive protein, Sporadic late onset Alzheimer's disease, ApoB, Triglycerides, Total cholesterol | 17474819, 17463246, 18193043, 18802019, 17998437, 19197348, 19567438           |
|                           |            |                                       |                                         | Dietary cholesterol (mg)                             |                        | 9.48e-3               | 5.84(2.25)            | 13291                    | WHI                     |                              |                                                                                                                                                                            |                                                                                |
|                           |            |                                       |                                         | LN1 dietary cholesterol (mg)                         |                        | 4.35e-3               | 0.03(9.66e-3)         | 13291                    | WHI                     |                              |                                                                                                                                                                            |                                                                                |
|                           |            |                                       |                                         | Dietary cholesterol (mg)                             |                        | 3.28e-3               | 6.94(2.36)            | 9194                     | ARIC                    |                              |                                                                                                                                                                            |                                                                                |
| CDKN2A, CDKN2B            | RS10757278 | A (0.5)                               | Artery Treatment                        | Coronary bypass surgery (Y/N)                        | EA                     | 9.60e-3               | -0.26(0.10)           | 4448                     | CHS                     | 2                            | Myocardial infarction                                                                                                                                                      | 17478679                                                                       |
|                           |            |                                       |                                         | Percutaneous transluminal coronary angioplasty (Y/N) |                        | 2.86e-6               | -0.17(0.04)           | 13313                    | WHI                     |                              |                                                                                                                                                                            |                                                                                |
| FTO                       | RS8050136  | A (0.4)                               | Hip Circumference                       | LN1 hip circumference cm                             | EA                     | 3.11e-7               | 7.67e-3(1.50e-3)      | 13272                    | WHI                     | 2                            | Obesity, Type 2 diabetes                                                                                                                                                   | 17554300, 19079260, 17463249, 17463248, 18372903, 18159244, 19056611, 17658951 |

**Table 3. Cont.**

| Nearest Gene | SNP ID    | CA <sup>1</sup> , (CAF <sup>2</sup> ) | Phenotypes <sup>3</sup>                | Associated Phenotype Class <sup>4</sup> | Ethnicity <sup>5</sup> | P-Values <sup>6</sup> | Beta(SE) <sup>7</sup> | Sample Size <sup>8</sup> | Substudies <sup>9</sup> | Substudy Count <sup>10</sup> | Previously Associated Phenotype <sup>11</sup> | References <sup>12</sup>                                                                 |
|--------------|-----------|---------------------------------------|----------------------------------------|-----------------------------------------|------------------------|-----------------------|-----------------------|--------------------------|-------------------------|------------------------------|-----------------------------------------------|------------------------------------------------------------------------------------------|
|              |           |                                       | LN1 hip girth to nearest cm            |                                         |                        | 1.26e-8               | 7.35e-3(1.29e-3)9334  | 9334                     | ARIC                    |                              |                                               |                                                                                          |
|              |           |                                       | Hip girth to nearest cm                |                                         |                        | 7.26e-9               | 0.81(0.14)            | 9334                     | ARIC                    |                              |                                               |                                                                                          |
|              |           |                                       | Hip circumference cm                   |                                         |                        | 6.06e-7               | 0.84(0.17)            | 13272                    | WHI                     |                              |                                               |                                                                                          |
| FTO          | RS8050136 | A (0.4)                               | LN1 waist hip ratio                    | Waist Hip Ratio                         | EA                     | 7.15e-3               | 1.46e-3(5.43e-4)13269 | 13269                    | WHI                     | 2                            | Obesity, Type 2 diabetes                      | 17554300, 19079260, 17463249, 17463248, 18372903, 18159244, 19056611, 17658951           |
|              |           |                                       | Waist-to-hip ratio                     |                                         |                        | 1.71e-7               | 6.11e-3(1.17e-3)9333  | 9333                     | ARIC                    |                              |                                               |                                                                                          |
|              |           |                                       | LN1 waist-to-hip ratio                 |                                         |                        | 1.75e-7               | 3.21e-3(6.10e-4)9333  | 9333                     | ARIC                    |                              |                                               |                                                                                          |
| FTO          | RS8050136 | A (0.4)                               | LN1 waist circumference cm             | Waist Size                              | EA                     | 2.88e-8               | 0.01(1.99e-3)         | 13284                    | WHI                     | 2                            | Obesity, Type 2 diabetes                      | 17554300, 19079260, 17463249, 17463248, 18159244, 19056611, 17658951                     |
|              |           |                                       | LN1 waist girth to nearest cm          |                                         |                        | 3.63e-12              | 0.01(2.01e-3)         | 9334,9334                | ARIC                    |                              |                                               |                                                                                          |
|              |           |                                       | Waist girth to nearest cm              |                                         |                        | 1.29e-12              | 1.40(0.20)            | 13284                    | ARIC                    |                              |                                               |                                                                                          |
|              |           |                                       | Waist circumference cm                 |                                         |                        | 1.91e-8               | 1.03(0.18)            |                          | WHI                     |                              |                                               |                                                                                          |
| IGF2BP2      | RS4402960 | G (0.7)                               | LN1 circulating glucose value in mg/dl | Plasma Serum Glucose                    | EA                     | 7.38e-3               | -8.10e-3(3.02e-3)     | 9339                     | ARIC                    | 2                            | Type 2 Diabetes                               | 17463249, 17463248, 17463246, 19401414                                                   |
|              |           |                                       | Baseline glucose (mg/dl)               |                                         |                        | 4.80e-3               | -2.07(0.73)           | 4468                     | CHS                     |                              |                                               |                                                                                          |
|              |           |                                       | LN1 baseline glucose (mg/dl)           |                                         |                        | 2.28e-3               | -0.01(4.84e-3)        | 4468                     | CHS                     |                              |                                               |                                                                                          |
| TCF7L2       | RS7903146 | C (0.7)                               | LN1 circulating glucose (mg/dl)        | Plasma Serum Glucose                    | EA                     | 8.39e-3               | -0.02(8.95e-3)        | 918                      | WHI                     | 2                            | Type 2 Diabetes                               | 19734900, 17668382, 17463246, 17463248, 18372903, 17293876, 17460697, 19056611, 19401414 |
|              |           |                                       | LN1 circulating glucose value in mg/dl |                                         |                        | 2.09e-7               | -0.02(2.99e-3)        | 10739                    | ARIC                    |                              |                                               |                                                                                          |
|              |           |                                       | Circulating glucose value in mg/dl     |                                         |                        | 1.73e-5               | -2.04(0.48)           | 10739                    | ARIC                    |                              |                                               |                                                                                          |

Related associations that met the criteria for PheWAS significance are given here, sorted by the number of PAGE site replications for a given phenotype-class. Related associations were defined as SNPs significantly associated in this PheWAS with phenotype-classes closely related to phenotypes among known associations. Significance was defined as a test of association with  $p < 0.01$  observed in two or more PAGE studies for the same SNP, phenotype-class, and race/ethnicity and consistent direction of effect when relevant. For each, the nearest gene(s), the SNP is number, coded allele (CA) and frequency (CAF), associated phenotypes, phenotype-class, race/ethnicity, p-values, genetic effect/beta values (standard error; SE), sample sizes, substudies, number of substudies with results passing our p-value cutoff, the previously associated phenotype for that SNP, and references for the previously associated phenotypes are given.

<sup>1</sup>Coded Allele.  
<sup>2</sup>Coded allele frequency.  
<sup>3</sup>Associated phenotypes for individual results.  
<sup>4</sup>Phenotype-class.  
<sup>5</sup>Race/ethnicity for association, abbreviations: African American (AA), European American (EA), Mexican American/Hispanic (H).  
<sup>6</sup>p-Values of results that passed  $p = 0.01$  threshold in order of the associated phenotypes.  
<sup>7</sup>Beta and standard error in order of the associated phenotypes.  
<sup>8</sup>Sample size in order of the associated phenotypes.  
<sup>9</sup>Studies with the significant result, in order of the associated phenotypes.  
<sup>10</sup>Total number of studies with at least one result passing p-value threshold for specific phenotype-class and SNP.  
<sup>11</sup>Previously reported associated phenotypes for SNP.  
<sup>12</sup>Pubmed ID's for previously associated phenotypes.  
 doi:10.1371/journal.pgen.1003087.t003

**Table 4.** PheWAS Tests of Association: Novel Associations.

| Nearest Gene | SNP ID     | CA <sup>1</sup> (CAF <sup>2</sup> ) | Phenotypes <sup>8</sup>                   | Associated Phenotype Class <sup>3</sup> | Ethnicity <sup>5</sup> | P-Values <sup>6</sup> | Beta (SE) <sup>7</sup> | Sample Size <sup>9</sup> | Substudies <sup>10</sup> | Substudy Count <sup>11</sup> | Previously Associated Phenotype <sup>4</sup>                | References <sup>12</sup>                         |
|--------------|------------|-------------------------------------|-------------------------------------------|-----------------------------------------|------------------------|-----------------------|------------------------|--------------------------|--------------------------|------------------------------|-------------------------------------------------------------|--------------------------------------------------|
| CELSR2,PSRC1 | RS599839   | A (0.3)                             | White blood cell (kcell/ml)               | White Blood Count                       | AA                     | 2.14e-3               | 0.88(0.29)             | 4147                     | WHI                      | 3                            | Coronary Artery Disease, LDL cholesterol, Total cholesterol | 18262040, 18193043, 18179892, 17634449, 18193044 |
|              |            |                                     | White blood count                         |                                         |                        | 3.69e-7               | 0.29(0.06)             | 3049                     | ARIC                     |                              |                                                             |                                                  |
|              |            |                                     | LN1 white blood count (×1,000/cubic mm)   |                                         |                        | 5.62e-4               | 0.05(0.01)             | 777                      | CHS                      |                              |                                                             |                                                  |
|              |            |                                     | LN1 white blood cell (kcell/ml)           |                                         |                        | 9.99e-15              | 0.05(6.03e-3)          | 4147                     | WHI                      |                              |                                                             |                                                  |
|              |            |                                     | LN1 white blood count                     |                                         |                        | 1.28e-8               | 0.04(7.65e-3)          | 3049                     | ARIC                     |                              |                                                             |                                                  |
| NOTCH2       | RS10923931 | G (0.7)                             | LN1 white blood cell count                | White Blood Count                       | AA                     | 9.59e-4               | 0.03(8.51e-3)          | 2083                     | EAGLEIII                 | 3                            | Type 2 Diabetes, Type I Diabetes                            | 18372903                                         |
|              |            |                                     | LN1 white blood cell count                |                                         |                        | 9.59e-4               | 0.03(8.51e-3)          | 2083                     | EAGLEIII                 |                              |                                                             |                                                  |
|              |            |                                     | White blood count                         |                                         |                        | 8.74e-4               | 0.18(0.05)             | 3051                     | ARIC                     |                              |                                                             |                                                  |
|              |            |                                     | White blood cell count                    |                                         |                        | 2.75e-4               | 0.25(0.07)             | 2083                     | EAGLEIII                 |                              |                                                             |                                                  |
|              |            |                                     | LN1 white blood cell (kcell/ml)           |                                         |                        | 1.36e-10              | 0.04(6.14e-3)          | 4215                     | WHI                      |                              |                                                             |                                                  |
|              |            |                                     | White blood cell count                    |                                         |                        | 2.75e-4               | 0.25(0.07)             | 2083                     | EAGLEIII                 |                              |                                                             |                                                  |
|              |            |                                     | LN1 white blood count                     |                                         |                        | 1.25e-3               | 0.02(7.14e-3)          | 3051                     | ARIC                     |                              |                                                             |                                                  |
| IL6R         | RS2228145  | A (0.9)                             | White blood count                         | White Blood Count                       | AA                     | 4.17e-8               | -0.36(0.06)            | 3806                     | ARIC                     | 3                            | C-reactive Protein                                          | 20186139                                         |
|              |            |                                     | White blood cell count                    |                                         |                        | 2.83e-4               | -0.35(0.10)            | 2038                     | EAGLEIII                 |                              |                                                             |                                                  |
|              |            |                                     | LN1 white blood count (×1,000/cubic mm)   |                                         |                        | 5.61e-4               | -0.06(0.02)            | 783                      | CHS                      |                              |                                                             |                                                  |
|              |            |                                     | White blood cell count                    |                                         |                        | 2.83e-4               | -0.35(0.10)            | 2038                     | EAGLEIII                 |                              |                                                             |                                                  |
|              |            |                                     | LN1 white blood count                     |                                         |                        | 8.42e-10              | -0.05(8.70e-3)         | 3806                     | ARIC                     |                              |                                                             |                                                  |
|              |            |                                     | LN1 white blood cell count                |                                         |                        | 3.57e-4               | -0.04(0.01)            | 2038                     | EAGLEIII                 |                              |                                                             |                                                  |
|              |            |                                     | LN1 white blood cell count                |                                         |                        | 3.57e-4               | -0.04(0.01)            | 2038                     | EAGLEIII                 |                              |                                                             |                                                  |
| NEGR1        | RS2815752  | T (0.08)                            | Ever smoked cigarettes (Y/N)              | Ever Smoked                             | EA                     | 7.57e-3               | 0.08(0.03)             | 9339                     | ARIC,WHI                 | 2                            | Body Mass Index                                             | 19079261                                         |
|              |            |                                     | Smoked at least 100 cigarettes ever (Y/N) |                                         |                        | 7.48e-4               | 0.09(0.03)             | 13222                    |                          |                              |                                                             |                                                  |

**Table 4.** Cont.

| Nearest Gene | SNP ID    | CA <sup>1</sup><br>(CAF <sup>2</sup> ) | Phenotypes <sup>8</sup>                  | Associated Phenotype Class <sup>3</sup> | Ethnicity <sup>5</sup> | P-Values <sup>6</sup> | Beta (SE) <sup>7</sup> | Sample Size <sup>9</sup> | Substudies <sup>10</sup> | Substudy Count <sup>11</sup> | Previously Associated Phenotype <sup>4</sup> | References <sup>12</sup>                                                                                                                                                                                                                                                                                                                                                                                                                                                                                                                                                                                         |
|--------------|-----------|----------------------------------------|------------------------------------------|-----------------------------------------|------------------------|-----------------------|------------------------|--------------------------|--------------------------|------------------------------|----------------------------------------------|------------------------------------------------------------------------------------------------------------------------------------------------------------------------------------------------------------------------------------------------------------------------------------------------------------------------------------------------------------------------------------------------------------------------------------------------------------------------------------------------------------------------------------------------------------------------------------------------------------------|
| IL6          | RS1800795 | C (0.06)                               | LNI beta carotene (dietary consumption)  | Carotene                                | AA                     | 5.43e-3               | 0.12(0.04)             | 3071                     | ARIC                     | 2                            | C-reactive Protein                           | 15820616,<br>16544245,<br>16644865,<br>17003362,<br>17416766,<br>17623760,<br>17694420,<br>17916900,<br>17996468,<br>18041006,<br>18239642,<br>18257935,<br>18276608,<br>18321738,<br>18449426,<br>18458677,<br>18752089,<br>18992263,<br>19056105,<br>19106168,<br>19140096,<br>19267250,<br>19280716,<br>19330901,<br>19377912,<br>19387461,<br>19435922,<br>19452524,<br>19542902,<br>19592000,<br>19671870,<br>19831146,<br>19853505,<br>19876004,<br>20043205,<br>2004998,<br>20132806,<br>20149313,<br>20175976,<br>20176930,<br>20334461,<br>20361391,<br>20436380,<br>20459474,<br>20592333,<br>20622166 |
|              |           |                                        | LNI carotenes (dietary consumption)      |                                         |                        | 9.44e-3               | 0.24(0.09)             | 1964                     | EAGLEIII                 |                              |                                              |                                                                                                                                                                                                                                                                                                                                                                                                                                                                                                                                                                                                                  |
|              |           |                                        | LNI alpha carotene (dietary consumption) |                                         |                        | 2.74e-3               | 0.26(0.09)             | 3071                     | ARIC                     |                              |                                              |                                                                                                                                                                                                                                                                                                                                                                                                                                                                                                                                                                                                                  |

**Table 4. Cont.**

| Nearest Gene | SNP ID    | CA <sup>1</sup> (CAF <sup>2</sup> ) | Phenotypes <sup>8</sup>                               | Associated Phenotype Class <sup>3</sup> | Ethnicity <sup>5</sup> | P-Values <sup>6</sup> | Beta (SE) <sup>7</sup> | Sample Size <sup>9</sup> | Substudies <sup>10</sup> | Substudy Count <sup>11</sup> | Previously Associated Phenotype <sup>4</sup>                | References <sup>12</sup>                         |
|--------------|-----------|-------------------------------------|-------------------------------------------------------|-----------------------------------------|------------------------|-----------------------|------------------------|--------------------------|--------------------------|------------------------------|-------------------------------------------------------------|--------------------------------------------------|
| IL6R         | RS2228145 | A (0.9)                             | LNT lymphocytes                                       | Lymphocytes                             | AA                     | 5.12e-10              | 0.06(0.01)             | 3769                     | ARIC                     | 2                            | C-reactive Protein                                          | 20186139                                         |
|              |           |                                     | Lymphocytes (percent of 100 cells)                    |                                         |                        |                       | 5.39e-5                | 2.96(0.73)               | 949                      | EAGLEIII                     |                                                             |                                                  |
|              |           |                                     | Lymphocytes                                           |                                         |                        | 6.63e-10              | 2.35(0.38)             | 3769                     | ARIC                     |                              |                                                             |                                                  |
|              |           |                                     | LNT lymphocytes (percent of 100 cells)                |                                         |                        |                       | 3.88e-5                | 0.08(0.02)               | 949                      | EAGLEIII                     |                                                             |                                                  |
| IL6R         | RS2228145 | A (0.9)                             | LNT neutrophils                                       | Neutrophils                             | AA                     | 1.54e-8               | -0.06(9.81e-3)         | 3769                     | ARIC                     | 2                            | C-reactive Protein                                          | 20186139                                         |
|              |           |                                     | LNT Segmented neutrophils                             |                                         |                        |                       | 2.44e-4                | -0.06(0.02)              | 949                      | EAGLEIII                     |                                                             |                                                  |
|              |           |                                     | Neutrophils                                           |                                         |                        | 4.66e-10              | -2.61(0.42)            | 3769                     | ARIC                     |                              |                                                             |                                                  |
|              |           |                                     | Segmented neutrophils                                 |                                         |                        |                       | 7.74e-5                | -3.12(0.79)              | 949                      | EAGLEIII                     |                                                             |                                                  |
| CELSR2,PSRC1 | RS599839  | A (0.8)                             | Currently of on a special diet? (Y/N)                 | Dieting                                 | EA                     | 9.48e-3               | 0.12(0.05)             | 9328                     | ARIC                     | 2                            | Coronary Artery Disease, LDL cholesterol, Total cholesterol | 18262040, 18193043, 18179892, 17634449, 18193044 |
| GALNT2       | RS2144300 | C (0.8)                             | Low-fat or low cholesterol diet (Y/N)                 |                                         |                        | 5.87e-3               | 0.08(0.03)             | 13068                    | WHI                      |                              |                                                             |                                                  |
|              |           |                                     | LNT FEV(3) over FEV(6) (Lung function)                | FEV3                                    | AA                     | 4.90e-4               | -0.11(0.03)            | 3090                     | ARIC                     | 2                            | Coronary Heart Disease, HDL cholesterol, Triglycerides      | 18193043                                         |
|              |           |                                     | FEV(3) (liters) (Lung function)                       |                                         |                        | 1.13e-3               | -0.10(0.03)            | 3090                     | ARIC                     |                              |                                                             |                                                  |
|              |           |                                     | LNT FEV3 at 3.0 seconds Largest value (Lung Function) |                                         |                        |                       | 8.82e-3                | -0.03(0.01)              | 1953                     | ARIC                         |                                                             |                                                  |
|              |           |                                     | FEV(3) over FEV(6) (Lung Function)                    |                                         |                        | 7.93e-4               | -2.26(0.67)            | 3090                     | EAGLEIII                 |                              |                                                             |                                                  |
|              |           |                                     | LNT FEV(3) (liters) (Lung Function)                   |                                         |                        |                       | 8.43e-4                | -0.03(7.92e-3)           | 3090                     | ARIC                         |                                                             |                                                  |
| GALNT2       | RS2144300 | C (0.8)                             | Pills for hypertension ever (Y/N)                     | Hypertension                            | AA                     | 8.27e-3               | 0.15(0.06)             | 4180                     | WHI                      | 2                            | Coronary Heart Disease, HDL cholesterol, Triglycerides      | 18193043                                         |
|              |           |                                     | High blood pressure ever diagnosed? (Y/N)             |                                         |                        | 1.61e-3               | 0.24(0.08)             | 3142                     | ARIC                     |                              |                                                             |                                                  |
|              |           |                                     | LNT serum total calcium: (mmol/l)                     | Serum Calcium                           | EA                     | 8.10e-3               | -2.36e-3(8.92e-4)      | 2587                     | EAGLEIII                 | 2                            | Coronary Heart Disease, HDL cholesterol, Triglycerides      | 18193043                                         |
|              |           |                                     | LNT serum calcium (mg-dl)                             |                                         |                        | 1.47e-3               | -1.84e-3(5.80e-4)      | 9098                     | ARIC                     |                              |                                                             |                                                  |
|              |           |                                     | Serum total calcium                                   |                                         |                        |                       | 5.95e-3                | 0.03(0.01)               | 2585                     | EAGLEIII                     |                                                             |                                                  |

**Table 4. Cont.**

| Nearest Gene        | SNP ID     | CA <sup>1</sup> (CAF <sup>2</sup> ) | Phenotypes <sup>8</sup>                                 | Associated Phenotype Class <sup>3</sup> | Ethnicity <sup>5</sup> | P-Values <sup>5</sup> | Beta (SE) <sup>7</sup> | Sample Size <sup>9</sup> | Substudies <sup>10</sup> | Substudy Count <sup>11</sup> | Previously Associated Phenotype <sup>4</sup>                       | References <sup>12</sup> |
|---------------------|------------|-------------------------------------|---------------------------------------------------------|-----------------------------------------|------------------------|-----------------------|------------------------|--------------------------|--------------------------|------------------------------|--------------------------------------------------------------------|--------------------------|
|                     |            |                                     | Serum total calcium (mmol/l)                            |                                         |                        | 7.47e-3               | -7.97e-3(2.98e-3)      | 2587                     | EAGLEIII                 |                              |                                                                    |                          |
|                     |            |                                     | LN1 serum total calcium (mmol/l)                        |                                         |                        | 6.28e-3               | -2.39e-3(8.75e-4)      | 2585                     | EAGLEIII                 |                              |                                                                    |                          |
|                     |            |                                     | LN1 serum total calcium                                 |                                         |                        | 6.40e-3               | -3.09e-3(1.13e-3)      | 2585                     | EAGLEIII                 |                              |                                                                    |                          |
|                     |            |                                     | Serum calcium (mg-dl)                                   |                                         |                        | 1.71e-3               | -0.02(6.24e-3)         | 9098                     | ARIC                     |                              |                                                                    |                          |
|                     |            |                                     | Serum total calcium (mmol/l)                            |                                         |                        | 5.95e-3               | -7.98e-3(2.90e-3)      | 2585                     | EAGLEIII                 |                              |                                                                    |                          |
| GALNT2              | RS2144300  | C (0.8)                             | LN1 white blood cell (kcell/ml)                         | White Blood Count                       | AA                     | 3.32e-6               | -0.04(7.53e-3)         | 4210                     | WHI                      | 2                            | Coronary Heart Disease, HDL cholesterol, Triglycerides             | 18193043                 |
|                     |            |                                     | LN1 white blood count (x1,000/cubic mm)                 |                                         |                        | 7.96e-3               | -0.05(0.02)            | 785                      | CHS                      |                              |                                                                    |                          |
| GALNT2              | RS2144300  | C (0.4)                             | Coronary artery bypass graft (cabg) (Y/N)               | Artery Treatment                        | EA                     | 2.46e-3               | 0.24(0.08)             | 13152                    | WHI                      | 2                            | Coronary Heart Disease, HDL cholesterol, Triglycerides             | 18193043                 |
|                     |            |                                     | Aortic Aneurysm repair (Y/N)                            |                                         |                        | 5.49e-3               | 0.57(0.20)             | 4250                     | CHS                      |                              |                                                                    |                          |
| LIPG                | RS2156552  | A (0.2)                             | Doctor ever told you had goiter? (Y/N)                  | Thyroid Goiter                          | EA                     | 8.60e-3               | -1.91(0.25)            | 2273                     | EAGLEIII                 | 2                            | HDL Cholesterol                                                    | 18193043                 |
|                     |            |                                     | Age told had goiter/thyroid disease                     |                                         |                        | 7.57e-3               | -2.97(1.11)            | 763                      | ARIC                     |                              |                                                                    |                          |
| CETP                | RS3764261  | T (0.3)                             | Age at first period category: 11 years                  | Menstruation                            | EA                     | 4.30e-3               | -0.11(0.04)            | 13276                    | WHI                      | 2                            | HDL Cholesterol, LDL cholesterol, Waist circumference              | 18193043, 19359809       |
|                     |            |                                     | Age when menstruation began                             |                                         |                        | 2.04e-3               | 0.11(0.03)             | 5705                     | WHI                      |                              |                                                                    |                          |
|                     |            |                                     | LN1 age when menstruation began                         |                                         |                        | 5.43e-4               | 9.19e-3(2.66e-3)       | 5705                     | ARIC                     |                              |                                                                    |                          |
|                     |            |                                     | Age at first period category: 10 years                  |                                         |                        | 6.81e-3               | -0.17(0.06)            | 13276                    | ARIC                     |                              |                                                                    |                          |
| FADS1, FADS2, FADS3 | RS174547   | C (0.3)                             | Platelet count                                          | Platelet Count                          | EA                     | 7.37e-3               | 3.26(1.22)             | 9174                     | ARIC                     | 2                            | HDL Cholesterol, Triglycerides, Total cholesterol, LDL cholesterol | 20037589, 19060906       |
|                     |            |                                     | LN1 platelet count (kcell/ml)                           |                                         |                        | 2.28e-3               | 0.01(3.30e-3)          | 13140                    | WHI                      |                              |                                                                    |                          |
|                     |            |                                     | LN1 platelet count                                      |                                         |                        | 1.68e-3               | 0.01(3.90e-3)          | 9174                     | ARIC                     |                              |                                                                    |                          |
| LDLR                | RS6511720  | G (0.9)                             | Max % arterial stenosis (1-24%) (Arterial measurement)  | Artery                                  | EA                     | 4.19e-3               | -0.22(0.08)            | 4460                     | CHS                      | 2                            | LDL Cholesterol                                                    | 18193043                 |
|                     |            |                                     | Arterial plaque in any site (Y/N)                       |                                         |                        | 9.19e-3               | 0.13(0.05)             | 8269                     | ARIC                     |                              |                                                                    |                          |
|                     |            |                                     | Max % arterial stenosis (25-49%) (Arterial measurement) |                                         |                        | 4.91e-3               | 0.21(0.07)             | 4460                     | CHS                      |                              |                                                                    |                          |
| PCSK9               | RS11591147 | G (0.996)                           | Coronary artery bypass graft (Y/N)                      | Artery Treatment                        | AA                     | 2.11e-4               | -2.23(0.60)            | 4274                     | WHI                      | 2                            | LDL Cholesterol, lipids                                            | 18193044                 |

Table 4. Cont.

| Nearest Gene                 | SNP ID     | CA <sup>1</sup><br>(CAF <sup>2</sup> ) | Phenotypes <sup>8</sup>                                                                                                                                                                                                    | Associated<br>Phenotype<br>Class <sup>3</sup> | Ethnicity <sup>5</sup> | P-<br>Values <sup>6</sup>                           | Beta<br>(SE) <sup>7</sup>                                                       | Sample<br>Size <sup>9</sup>   | Substudies <sup>10</sup>            | Substudy<br>Count <sup>11</sup> | Previously<br>Associated<br>Phenotype <sup>4</sup>                                                                                                                                                  | References <sup>12</sup>                                                               |
|------------------------------|------------|----------------------------------------|----------------------------------------------------------------------------------------------------------------------------------------------------------------------------------------------------------------------------|-----------------------------------------------|------------------------|-----------------------------------------------------|---------------------------------------------------------------------------------|-------------------------------|-------------------------------------|---------------------------------|-----------------------------------------------------------------------------------------------------------------------------------------------------------------------------------------------------|----------------------------------------------------------------------------------------|
| APOE, APOC1,<br>APOC4, APOC2 | RS4420638  | A (0.8)                                | Heart or arterial surgery? (Y/N)<br>Circulating glucose<br>value in mg/dl                                                                                                                                                  | Plasma Serum<br>Glucose                       | EA                     | 1.53e-3<br>8.86e-4                                  | -1.97(0.62)<br>1.89(0.57)                                                       | 3909<br>9336                  | ARIC<br>ARIC                        | 2                               | LDL Cholesterol,<br>lipids, Alzheimer's<br>disease, Coronary<br>Artery Disease, C-<br>reactive protein,<br>Sporadic late onset<br>Alzheimer's disease,<br>ApoB, Triglycerides,<br>Total cholesterol | 17474819,<br>17463246,<br>18193043,<br>18802019,<br>17998437,<br>19197348,<br>19567438 |
| CELSR2,<br>PSRC1, SORT1      | RS646776   | G (imputed)                            | Baseline glucose (mg/dl)<br>LN1 circulating baseline<br>glucose (mg/dl)<br>LN1 circulating glucose value<br>in mg/dl                                                                                                       |                                               |                        | 4.65e-3<br>5.67e-3<br>6.81e-4                       | 2.67(0.94)<br>0.02(6.23e-3)<br>0.01(3.62e-3)                                    | 4470<br>4470<br>9336          | CHS<br>CHS<br>ARIC                  | 2                               | LDL Cholesterol,<br>Myocardial<br>infarction (early<br>onset)                                                                                                                                       | 18193044,<br>18262040                                                                  |
| APOB                         | RS562338   | T (0.6)                                | Low-fat or low cholesterol<br>diet (Y/N)<br>Are you following a<br>special diet (Y/N)<br>Currently of diet (Y/N)                                                                                                           | Dieting                                       | EA                     | 4.20e-3<br>8.78e-3                                  | -0.14(0.05)<br>-0.08(0.03)                                                      | 9331<br>13051                 | ARIC<br>WHI                         | 2                               | LDL Cholesterol,<br>Total cholesterol,<br>Type 2 Diabetes                                                                                                                                           | 18193043                                                                               |
| CDKN2A, CDKN2B               | RS10757278 | A (0.8)                                | White blood count<br>LN1 white blood cell (kcell/ml)<br>LN1 dietary vitamin b12 (mcg)<br>Dietary vitamin b12 (mcg)<br>LN1 vitamin b12 (micrograms)<br>LN1 hemoglobin (g/dl)<br>LN1 hemoglobin (gm/dl)<br>Hemoglobin (g/dl) | White Blood<br>Count                          | AA                     | 5.07e-3<br>5.05e-4<br>3.24e-3<br>3.80e-3<br>4.34e-3 | -0.19(0.07)<br>-0.03(7.32e-3)<br>-0.16(0.05)<br>-0.02(6.96e-3)<br>0.02(5.69e-3) | 3149<br>3877<br>4214<br>13254 | ARIC<br>ARIC<br>ARIC<br>WHI<br>WHI  | 2                               | Myocardial<br>infarction                                                                                                                                                                            | 17478679                                                                               |
| ANGPTL3                      | RS1748195  | G (0.6)                                | LN1 white blood count<br>LN1 hemoglobin (g/dl)<br>LN1 hemoglobin (gm/dl)<br>Hemoglobin (g/dl)                                                                                                                              | Hemoglobin                                    | AA                     | 7.66e-3<br>9.57e-3<br>6.28e-3                       | -9.61e-3(3.60e-3)<br>-4.64e-3(1.79e-3)<br>-0.14(0.05)                           | 2085<br>4195<br>2085          | ARIC<br>EAGLEIII<br>WHI<br>EAGLEIII | 2                               | Triglycerides, lipids                                                                                                                                                                               | 18193043                                                                               |
| ADAMTS9                      | RS4607103  | C (0.8)                                | LN1 min lumen diameter (arterial<br>measurement)<br>LN1 average near and far wall<br>max common carotid artery<br>(mm) (Arterial measurement)                                                                              | Artery                                        | EA                     | 7.00e-3<br>6.22e-3                                  | 0.07(0.03)<br>6.32e-3(2.31e-3)                                                  | 120<br>4460                   | ARIC<br>CHS                         | 2                               | Type 2 Diabetes                                                                                                                                                                                     | 18372903                                                                               |

**Table 4. Cont.**

| Nearest Gene | SNP ID     | CA <sup>1</sup><br>(CAF <sup>2</sup> ) | Phenotypes <sup>8</sup>                                                     | Associated Phenotype Class <sup>3</sup> | Ethnicity <sup>5</sup> | P-Values <sup>6</sup> | Beta (SE) <sup>7</sup> | Sample Size <sup>9</sup> | Substudies <sup>10</sup> | Substudy Count <sup>11</sup> | Previously Associated Phenotype <sup>4</sup> | References <sup>12</sup>               |
|--------------|------------|----------------------------------------|-----------------------------------------------------------------------------|-----------------------------------------|------------------------|-----------------------|------------------------|--------------------------|--------------------------|------------------------------|----------------------------------------------|----------------------------------------|
|              |            |                                        | Ave near and far wall max common carotid artery (mm) (Arterial measurement) |                                         |                        | 7.91e-3               | 0.01(5.02e-3)          | 4460                     | CHS                      |                              |                                              |                                        |
| ADAMTS9      | RS4607103  | C (0.8)                                | Smoked at least 100 cigarettes ever? (Y/N)                                  | Ever Smoked                             | EA                     | 1.38e-3               | -0.09(0.03)            | 13214                    | WHI                      | 2                            | Type 2 Diabetes                              | 18372903                               |
| IGF2BP2      | RS4402960  | G (0.7)                                | Ever smoked? (Y/N)                                                          |                                         | EA                     | 4.11e-3               | -0.14(0.05)            | 4477                     | CHS                      | 2                            | Type 2 Diabetes                              | 17463249, 17463248, 17463246, 19401414 |
|              |            |                                        | Currently of diet? (Y/N)                                                    | Dieting                                 | EA                     | 3.14e-4               | -0.15(0.04)            | 9331                     | ARIC                     |                              |                                              |                                        |
|              |            |                                        | Diabetic or ADA diet? (Y/N)                                                 |                                         |                        | 9.63e-4               | -0.23(0.07)            | 12958                    | WHI                      |                              |                                              |                                        |
| TCF7L2       | RS7901695  | C (0.5)                                | LN1 white blood count, white blood count                                    | White Blood Count                       | AA                     | 2.75e-3               | -0.02(6.77e-3)         | 3053                     | ARIC                     | 2                            | Type 2 Diabetes                              | 17554300, 17463249, 17463246, 17668382 |
|              |            |                                        | LN1 white blood cell (kcell/ml)                                             |                                         |                        | 7.03e-3               | -0.14(0.05)            | 3053                     | ARIC                     |                              |                                              |                                        |
|              |            |                                        | LN1 heart rate per minute                                                   |                                         |                        | 7.73e-3               | -0.02(5.76e-3)         | 4182                     | WHI                      |                              |                                              |                                        |
| TSPAN8/LGR5  | RS7961581  | C (0.3)                                | Pulse rate (beats/min) (age 5+ years)                                       | HeartRate                               | EA                     | 8.38e-3               | -1.33(0.50)            | 2570                     | EAGLEIII                 | 2                            | Type 2 Diabetes                              | 18372903                               |
|              |            |                                        | LN1 heart rate per minute                                                   |                                         |                        | 8.17e-3               | -6.20e-3 (2.34e-3)     | 9314                     | ARIC                     |                              |                                              |                                        |
| NOTCH2       | RS10923931 | G (0.7)                                | Hypertension ever (Y/N)                                                     | Hypertension                            | AA                     | 3.07e-3               | -0.14(0.05)            | 4206                     | WHI                      | 2                            | Type 2 Diabetes, Type I Diabetes             | 18372903                               |
|              |            |                                        | History of high blood pressure from baseline questionnaire (Y/N)            |                                         |                        | 2.00e-3               | -0.14(0.04)            | 4736                     | MEC                      |                              |                                              |                                        |
|              |            |                                        | History of high blood pressure (Y/N)                                        |                                         |                        | 3.50e-3               | -0.14(0.05)            | 4362                     | MEC,                     |                              |                                              |                                        |
|              |            |                                        | Hypertension interested category: never Hypertensive (Y/N)                  |                                         |                        | 2.33e-3               | -0.15(0.05)            | 4076                     | WHI                      |                              |                                              |                                        |
|              |            |                                        | Hypertension interested category: treated Hypertensive (Y/N)                |                                         |                        | 2.92e-3               | -0.14(0.05)            | 4076                     | WHI                      |                              |                                              |                                        |
|              |            |                                        | Pills for hypertension ever (Y/N)                                           |                                         |                        | 8.18e-4               | -0.16(0.05)            | 4186                     | WHI                      |                              |                                              |                                        |
|              |            |                                        | Pills for hypertension now (Y/N)                                            |                                         |                        | 2.82e-3               | -0.14(0.05)            | 4122                     | WHI                      |                              |                                              |                                        |



**Table 4. Cont.**

| Nearest Gene         | SNP ID    | CA <sup>1</sup><br>(CAF <sup>2</sup> ) | Phenotypes <sup>8</sup>                           | Associated Phenotype Class <sup>3</sup> | Ethnicity <sup>5</sup> | P-Values <sup>6</sup> | Beta (SE) <sup>7</sup> | Sample Size <sup>9</sup> | Substudies <sup>10</sup> | Substudy Count <sup>11</sup> | Previously Associated Phenotype <sup>4</sup>           | References <sup>12</sup>                                             |
|----------------------|-----------|----------------------------------------|---------------------------------------------------|-----------------------------------------|------------------------|-----------------------|------------------------|--------------------------|--------------------------|------------------------------|--------------------------------------------------------|----------------------------------------------------------------------|
| FTO                  | RS8050136 | A (0.4)                                | Age at first period interested category: 14 years | Menstruation                            | EA                     | 5.26e-3               | -0.10(0.04)            | 13275                    | WHI                      | 2                            | Obesity, Type 2 diabetes                               | 17554300, 19079260, 17463249, 17463248, 18159244, 19056611, 17658951 |
|                      |           |                                        | Age when menstruation began                       |                                         |                        | 1.18e-4               | -0.14(0.04)            | 4917                     | ARIC                     |                              |                                                        |                                                                      |
|                      |           |                                        | LNI age when Menstruation began                   |                                         |                        | 6.09e-5               | -0.01(2.74e-3)         | 4917                     | ARIC                     |                              |                                                        |                                                                      |
| CELSR2, PSRC1, SORT1 | RS646776  | G (imputed)                            | Hospitalized for chest pain? (Y/N)                | ANGINA                                  | EA                     | 3.05e-3               | -0.55(0.18)            | 568                      | ARIC                     | 2                            | LDL Cholesterol                                        | 19060911, 19198609, 18193044, 18262040, 19060910                     |
|                      |           |                                        | Angina (Y/N)                                      |                                         |                        | 3.17e-4               | -0.25(0.07)            | 13289                    | WHI                      |                              |                                                        |                                                                      |
| CDKN2A, CDKN2B       | RS1333049 | C (0.2)                                | Hemoglobin (g/dl)                                 | Hemoglobin                              | AA                     | 5.40e-3               | 0.15(0.05)             | 2092                     | EAGLEIII                 | 2                            | Coronary Artery Disease, Type 2 Diabetes, Hypertension | 17554300, 17634449                                                   |
|                      |           |                                        | Hemoglobin (g/dl)                                 |                                         |                        | 8.21e-3               | 0.26(0.10)             | 786                      | CHS                      |                              |                                                        |                                                                      |
|                      |           |                                        | LNI Hemoglobin (g/dl)                             |                                         |                        | 4.07e-3               | 0.01(3.95e-3)          | 2092                     | EAGLEIII                 |                              |                                                        |                                                                      |

Novel associations that met the criteria for PheWAS significance are given here, sorted by the most to least number of PAGE study sites available. Related associations were defined as SNPs significantly associated in this PheWAS with phenotype-classes closely related to phenotypes among known associations. Significance was defined as a test of association with  $p < 0.01$  observed in two or more PAGE studies for the same SNP, phenotype class, and race/ethnicity and consistent direction of effect when relevant. For each, the nearest gene(s), the SNP rs number, coded allele (CA) and frequency (CAF), associated phenotypes, phenotype-class, race/ethnicity, p-values, genetic effect/beta values (standard error; SE), sample sizes, substudies, number of substudies with results passing our p-value cutoff, the previously associated phenotype for that SNP, and references for the previously associated phenotypes are given.

<sup>1</sup>Coded Allele.

<sup>2</sup>Coded allele frequency.

<sup>3</sup>Associated phenotypes.

<sup>4</sup>Phenotype-class.

<sup>5</sup>Race/ethnicity for association, abbreviations: African American (AA), European American (EA), Mexican American/Hispanic (H).

<sup>6</sup>p-Values of results that passed  $p = 0.01$  threshold in order of the associated phenotypes.

<sup>7</sup>Beta and standard error in order of the associated phenotypes.

<sup>8</sup>Sample size in order of the associated phenotypes.

<sup>9</sup>Studies with the significant result, in order of the associated phenotypes.

<sup>10</sup>Total number of studies with at least one result passing p-value threshold for specific phenotype class and SNP.

<sup>11</sup>Previously reported associated phenotypes for the SNP.

<sup>12</sup>Pubmed ID's for previously associated phenotypes.

doi:10.1371/journal.pgen.1003087.t004

# APOE/APOC1/C1P1/C2/C4, rs4420638, Coded Allele A

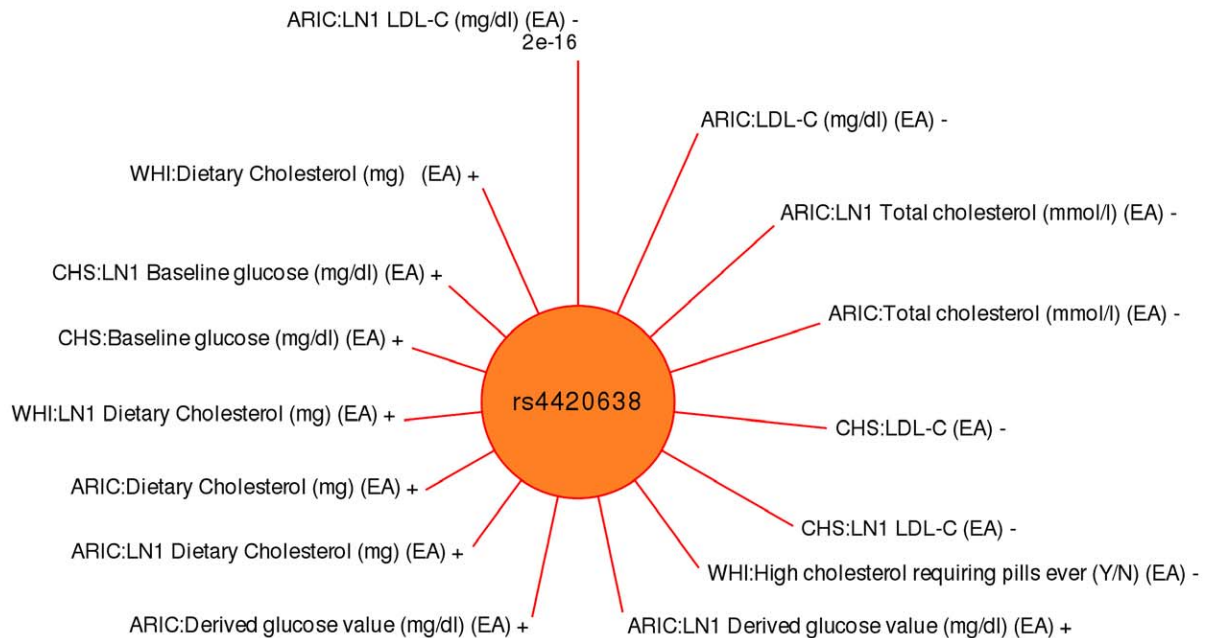

**Figure 1. PheWAS associations for rs4420638 near APOC1.** SNP rs4420638 has previously been associated with LDL cholesterol levels, triglycerides, Alzheimer's disease, coronary artery disease, and sporadic late onset Alzheimer's. The length of the lines correspond to  $-\log_{10}(p\text{-value})$ , and the lines are plotted clockwise starting at top for the association with the smallest p-value. Lines are labeled with the study-specific phenotype, the PAGE study, racial/ethnic group, and direction of effect (+ or -). Red lines represent associations at  $p < 0.01$ . "LN1" indicates the phenotype had 1 added to the variable, and then the variable was natural log transformed. The PheWAS phenotypes significantly associated with this SNP varied, with known associations for LDL cholesterol levels, as well as the related phenotypes "Total cholesterol (mmol/l)" and "Dietary cholesterol (mg)", and novel phenotypes such as "Baseline glucose (mg/dl)".  
doi:10.1371/journal.pgen.1003087.g001

[8,12–14]; type 2 diabetes (rs10923931) [16]; C-reactive protein (rs2228145) [17]; coronary heart disease, HDL-C and triglycerides (rs2144300) [13]; MI (rs10757278) [11]; and type 2 diabetes (rs7901695) in EA [18–20]. It is likely that the majority of the significant findings for three of the SNPs on chromosome 1 [rs599839 (*CELSR2/PSRC1*), rs10923931 (*NOTCH2*), rs2228145 (*IL6R*)] are not truly novel given that these variants are likely in linkage disequilibrium with the white blood cell count-associated Duffy null allele (*DARC* rs2814778) [21,22] in African Americans. Of note is *GALNT2* rs2144300 ( $p = 3.32 \times 10^{-6}$  in WHI and  $7.96 \times 10^{-3}$  in CHS), located outside the 90 Mb region known to be associated with white blood cell counts in African Americans [21] and possibly representing a novel genotype-phenotype association for this trait. Also for chromosome 1, novel associations were identified in African Americans at  $p < 0.01$  for the phenotype-class "Hemoglobin" and *ANGPTL3* rs1748195, previously associated with triglycerides in European-descent populations [13,19].

Of the remaining hematologic trait associations identified that were not on chromosome 1, rs10757278 near *CDKN2A/B* on chromosome 9 and *TCF7L2* rs7901695 on chromosome 10 were both associated with white blood cell count, neither of which were previously reported in GWAS for this trait [21,22]. For *CDKN2A/B* rs1333049, a SNP previously associated with type 2 diabetes, coronary artery disease, and hypertension in European-descent populations [15,23]  $p < 0.01$  associations were identified for the phenotype-class of Hemoglobin. Finally, a novel association in European Americans was noted between *FADS1* rs174547, a SNP previously associated with LDL-C [13,19], and the phenotype-class of "Platelet Count" at  $p < 0.01$ .

Aside from hematologic traits, the most significant novel association identified in this PheWAS was identified for phenotypes in the phenotype-class "Forced Expiratory Volume in 3 Seconds (FEV3)" and *GALNT2* rs2144300 in African Americans ( $p$ -values ranging from  $8.82 \times 10^{-3}$  to  $4.90 \times 10^{-4}$ ). *GALNT2* rs2144300, previously associated with HDL-C in European Americans and African Americans [13,24], has not previously been associated with lung function or asthma quantitative traits. Interestingly, *GALNT2* rs2144300 was also associated with phenotypes in the "Hypertension" phenotype-class among African Americans in this PheWAS. Specifically the phenotypes were "High blood pressure ever diagnosed?" (ARIC,  $p = 1.61 \times 10^{-3}$ ,  $\beta = 0.24$ ) and "Pills for hypertension ever?" (WHI,  $8.27 \times 10^{-3}$ ,  $\beta = 0.15$ ). Indeed, *GALNT2* rs2144300 displayed the most suggestion of pleiotropy among all the SNPs tested in this study. In addition to the associations identified in African Americans, rs2144300 was associated with phenotypes in the phenotype-classes "Serum Calcium" ( $p$ -values ranging from  $1.47 \times 10^{-4}$  to  $8.10 \times 10^{-3}$ ) and "Artery Treatment", specifically the phenotypes "Coronary artery bypass graft (CABG)" (WHI,  $p = 2.46 \times 10^{-3}$ ,  $\beta = 0.24$ ) and "Aortic aneurysm repair" (CHS,  $5.49 \times 10^{-3}$ ,  $\beta = 0.57$ ) in European Americans. Significant PheWAS associations at  $p < 0.01$  for rs2144300 are plotted by phenotype in Figure 5, as well as additional results at  $p < 0.05$ .

The remaining significant novel PheWAS results have identified potentially pleiotropic effects for SNPs previously associated with lipid traits, type 2 diabetes, inflammation, myocardial infarction, and body mass index. The lipid trait-associated SNPs were associated with the "Menstruation" phenotype-class (specifically age at menarche) in European Americans (*CETP* rs3764261), the

## CDKN2A/CDKN2B, rs10757278, Coded Allele A

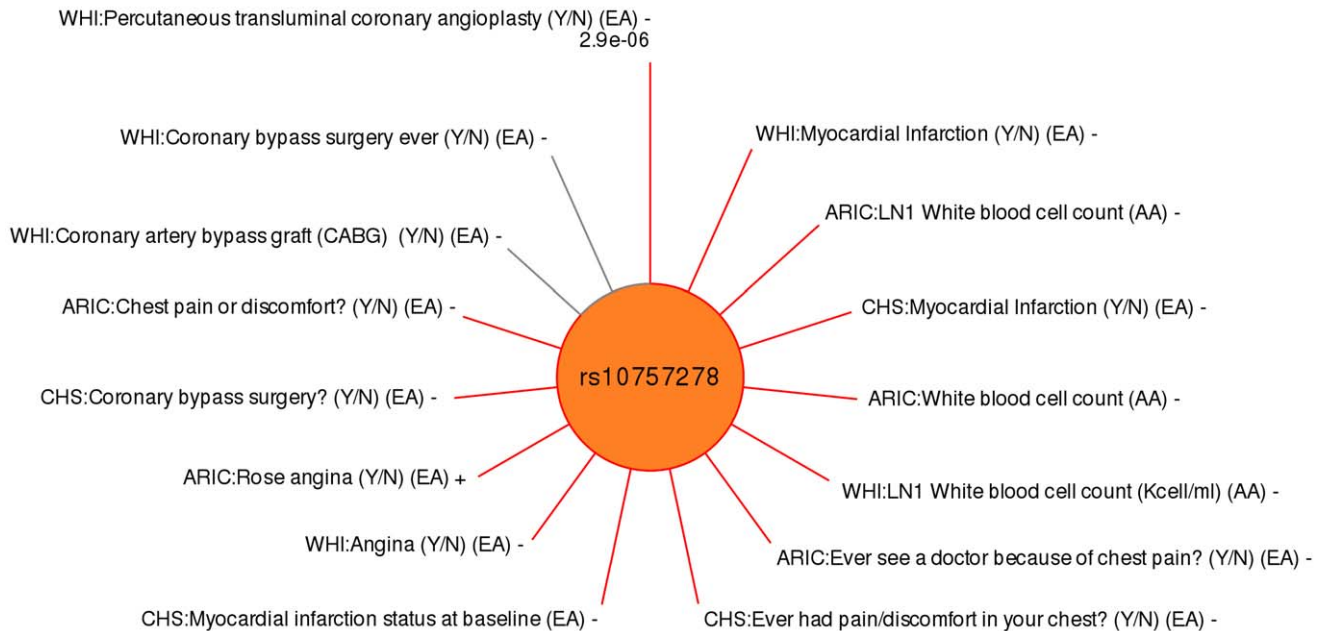

**Figure 2. PheWAS associations for rs10757278 near *CDKN2A/CDKN2B*.** SNP rs10757278 was previously associated with myocardial infarction (MI). Associations are plotted clockwise starting at top for the association with the smallest p-value and the length of the line corresponds to  $-\log_{10}(p\text{-value})$ . Lines are labeled with the study-specific phenotype, the PAGE study, racial/ethnic group, and direction of effect (+ or -). Red lines represent associations at  $p < 0.01$ , and results with  $p < 0.05$  are also plotted in grey to show trends for additional phenotypes. “LN1” indicates the phenotype had 1 added to the variable, and then the variable was natural log transformed. The PheWAS phenotypes significantly associated with this SNP varied, from MI (known), to coronary artery disease and MI related phenotypes such as presence or absence of “percutaneous transluminal coronary angioplasty”, “angina”, and “coronary bypass surgery”.  
doi:10.1371/journal.pgen.1003087.g002

“Dieting” phenotype-class (*APOB* rs562338 in African Americans and *CELSR2/PSRC1/SORT1* rs599839 and rs646776 in European Americans), “Thyroid Goiter” in European Americans (*LIPG* rs2156552), “Artery Measurements” in European Americans (*LDLR* rs6511720) and “Artery Treatment” in African Americans (*PCSK9* rs11591147), “Plasma Serum Glucose Levels” (*APOE/APOC1/APOC4/APOC2/APOC3* rs4420638) in European Americans, and the “Angina” phenotype-class in European Americans (*CELSR2/PSRC1/SORT1* rs646776). For the type 2 diabetes-associated SNPs, the PheWAS-identified associations were observed for the phenotype-classes of “Dieting” (*IGFBP2* rs4402960) in European Americans, “Artery” and “Ever Smoked” (*ADAMTS9* rs4607103) in European Americans, “Hypertension” (*NOTCH2* rs10923931) in African Americans, “Heart Rate” (*LGR5* rs7961581) in European Americans, and “Menstruation” (specifically age at menarche) in European Americans (*FTO* rs8050136). Like type 2 diabetes-associated *ADAMTS9* rs4607103, BMI-associated *NEGR1* rs2815752 was associated with the phenotype-class of “Ever Smoked” in European Americans. The final two PheWAS-identified significant associations involved nutrient based phenotype-classes: MI-associated *CDKN2A/B* rs2383207 was associated with the phenotype-classes of “Vitamin B12” in European Americans, and inflammation-associated *IL6* rs1800795 was associated with the phenotype-class of “Carotene” in African Americans.

### Discussion

The PheWAS results herein present the result of tests of association between a large number of SNPs and an extensive

range of phenotypes and traits available within five studies of the PAGE network. For this first PAGE PheWAS analysis we have emphasized associations that replicated across two or more independent PAGE studies for the same phenotype class and same race/ethnicity. Most of the robust findings reported here represent previously known genotype-phenotype relationships, but a tantalizing few also represent potentially novel pleiotropic relationships.

The 33 novel results presented here are intriguing, but it is important to emphasize that these first-pass analyses are considered hypothesis-generating, exploratory, and require additional scrutiny before the findings are further considered for follow-up, unlike the directed *a priori* hypothesis-testing analyses within PAGE that involve SNPs hypothesized to be associated with specific phenotypes. Further analysis of PheWAS results will be on an individual result basis and will include careful phenotype harmonization for traits and outcomes that cross two or more PAGE studies, as well as considerable investigation of the possible effect of covariates such as age, sex, and environmental exposure(s) on the association between genetic variation and phenotypic outcome.

One of the many challenges for the interpretation of PheWAS results is dissecting the genetic effect observed among correlated phenotypes. In some cases, the relationship is likely attributable to a common biological process with known genetic contribution (e.g., body mass index and waist circumference). In other cases, the networks that exist between intermediary and/or outcome related phenotypes add complexity to interpreting association results. For instance, genetic variation may impact the variation of a single

## CELSR2/PSRC1, rs599839, Coded Allele A

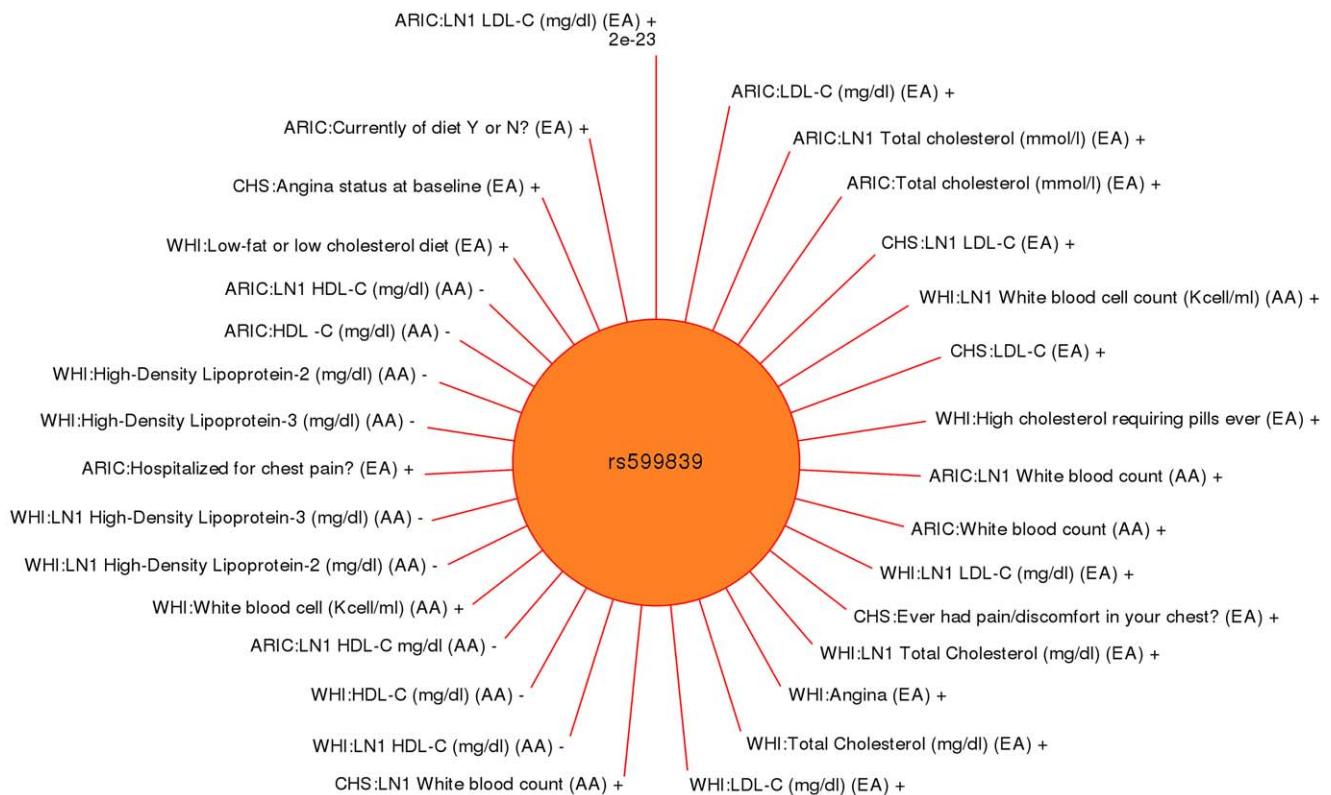

**Figure 3. PheWAS associations for rs599839 near *CELSR2/PSRC1*.** This SNP has previously published associations with serum LDL cholesterol levels, total cholesterol, and coronary artery disease. Genotype-phenotype associations are plotted clockwise starting at top for the association with the smallest p-value. The length of the line corresponds to  $-\log_{10}(p\text{-value})$ , the longer the line the more significant the result. The study race/ethnicity/and phenotype for each tests of association are listed. Red lines represent associations at  $p < 0.01$ , and results with  $p < 0.05$  are also plotted in grey to show trends for additional phenotypes. “LN1” indicates the phenotype had 1 added to the variable, and then the variable was natural log transformed. The PheWAS phenotypes significantly associated with this SNP varied, from LDL cholesterol levels (previously published), to lipid level-related phenotypes such as “High cholesterol requiring pills ever”. In the case of coronary artery disease, phenotypes with significant results that were related to coronary artery disease included “Ever had pain/discomfort in your chest”, and “Hospitalized for chest pain”. doi:10.1371/journal.pgen.1003087.g003

phenotype, but variation in that phenotype could then result in changes in other downstream phenotypes indirectly. Examples of added complexity include obesity leading to impaired immune function [28], and metabolic syndrome where there is a spectrum of risk factors that are all associated with increased risk of cardiovascular disease and type 2 diabetes [25]. As a result, significant associations between a genetic variant and many phenotypes could represent a network or cascade of events. This is a potential interpretation of results found for SNP rs10923931 (*NOTCH2*) in AA, where type 2 diabetes was the previously reported association for this SNP and the novel result was found for hypertension, and type 2 diabetes and hypertension are often a co-occurrence. Further analysis of individual PheWAS results is necessary to conclusively establish the impact of the relationship between phenotypes on significant SNP-phenotype associations.

With the large number of phenotype-genotype associations calculated, there will be an increase in type 1 error due to multiple testing. A Bonferroni correction could be used within each individual study to choose a cutoff for significance that controls for multiple hypothesis testing. However, this would not take into account the correlations that exist between the phenotypes in these studies that impact the assumption of independence between tests as well as the correlations between the genotypes.

For our first PAGE PheWAS analysis, we chose to seek replication of results across studies and required the same direction of effect as one approach to reduce the false discovery rate. Significant results can still be found by chance across more than one study. Multiple challenges arise when attempting to get a metric of the type 1 error rate across multiple studies. First, as with individual studies, correlations between phenotypes and previous associations for the SNPs are still present. Also, there are varying type 1 error rates depending on the number of studies available for seeking replication. Quantification of how many results were found with a p-value cutoff, and without a p-value cutoff, depending on the number of studies where replication could be sought (2, 3, 4, or 5) provides some information about the number of significant results we found, in Table 2. Table 1 has the total number of results with and without p-value cutoff for individual studies. It is important to note that in cases where replication could be sought in more than two studies, there were cases where the result replicated in 3 or more studies, further increasing our confidence in the result.

A potential limitation of this study is the granularity of phenotypes within our phenotype classes. The phenotypes within some phenotype classes are the same or extremely similar, such as white blood cell count measurements across studies. However, the phenotype class “Artery Treatment” is broad in terms of the types

# PheWAS Hematologic Trait Results

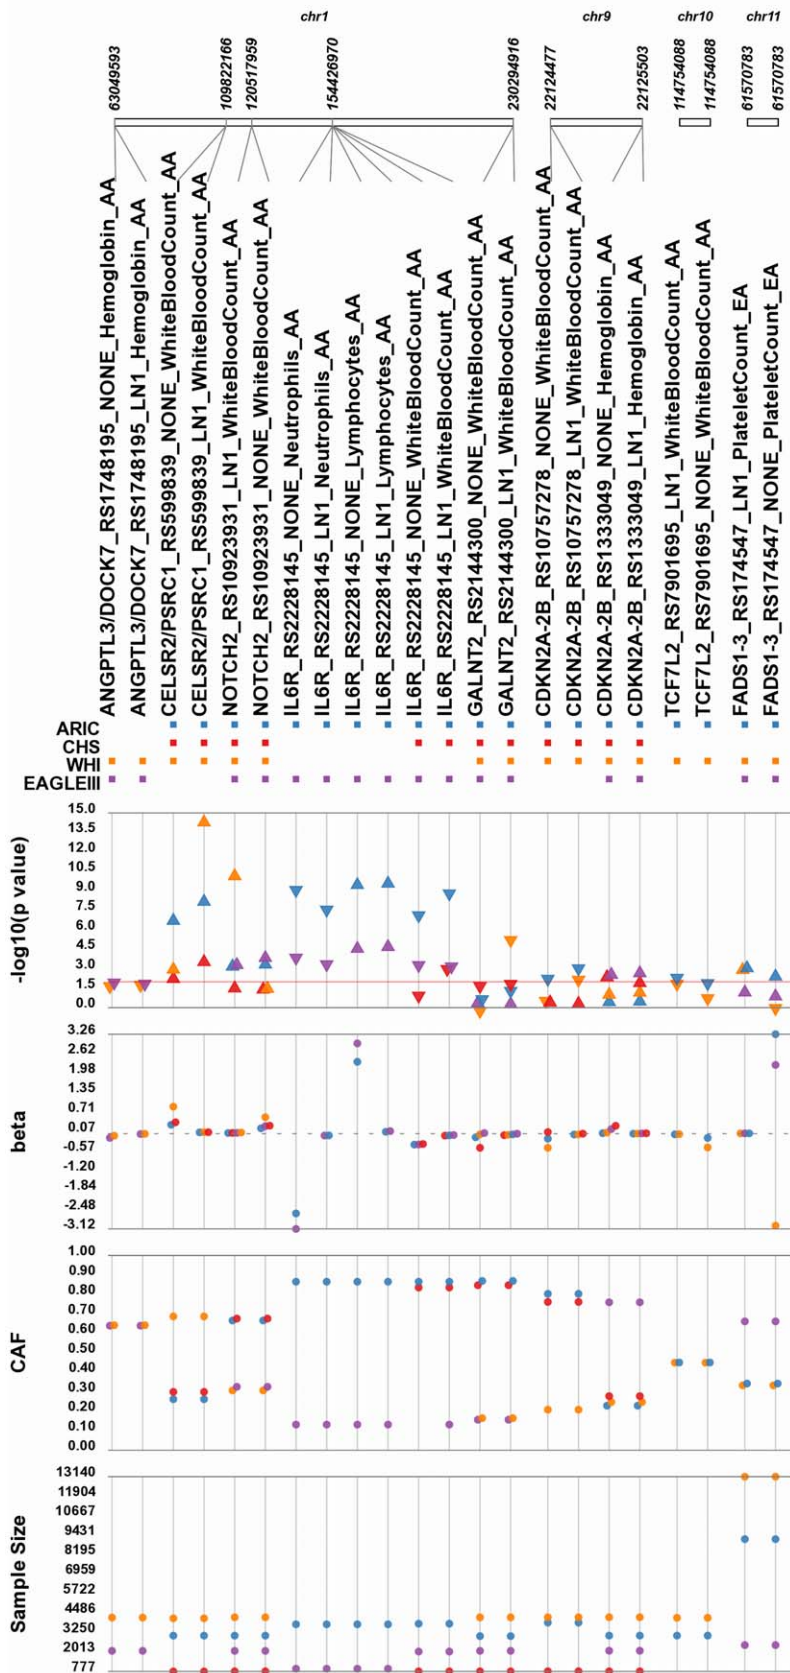

**Figure 4. PheWAS results for blood cell counts and hemoglobin levels.** Eleven novel genotype-phenotype-class associations were identified for white blood cell counts and hemoglobin levels collectively. The top track indicates the chromosomal location of each SNP, below that track is a SNP/Phenotype identification track containing the SNP ID, as well as the phenotype, phenotype transformation if present (LN1 = ln(1+variable)), and the race-ethnicity for the test population (AA or EA). The next track is a “presence/absence” track, box presence indicates if the SNP was present for ARIC (blue), CHS (red), WHI (orange), or EAGLE (purple). The next tracks are as follows:  $-\log_{10}(p\text{-value})$ , where the each p-value is plotted, the direction of the triangle indicates the direction of effect (triangle pointed up is positive, triangle pointed down is negative), base of the triangle corresponds to the location of the p-value, solid red line is positioned at  $p\text{-value} = 0.01$ ; The next track is magnitude of effect (beta) dotted grey line is positioned at the null; Next are coded allele frequencies (CAF) for each study; Final track is sample size for each test of association.  
doi:10.1371/journal.pgen.1003087.g004

of phenotypes included, such as presence/absence aortic aneurysm repair and presence/absence of angioplasty of the coronary arteries. For some classes, the replicated results encompass more variation in the phenotypes captured, compared to other results. As a result, significant associations between a genetic variant and all phenotypes in a network may be present. PheWAS is an exploratory and hypothesis generating exercise, thus the choice was made to have a broader match for some groups of phenotypes in order to allow for those phenotypes to be part of the exploration of the data. In addition, misclassification of phenotypes when matching is possible, and thus can limit identification of significant associations across studies. Other potential limitations include sample size/power, study heterogeneity, and the SNPs selected for study. As shown in Table 1, there is much variability across independent PAGE studies. While each PAGE study is sizeable, individual tests of association may be underpowered depending on the availability of the genetic variant, phenotype class, and race/ethnicity. Tests of association that failed to reach statistical significance may represent underpowered genotype-phenotype relationships and will require larger epidemiologic or clinic-based

samples to identify. In regards to the potential impact of heterogeneity, we have some cases where replication existed in only two or three studies out of those where replication could be sought. In some instances this may be due to power, but this also may reflect the heterogeneity between studies, such as how various phenotypes are measured in individual studies and variation in mean age across the different studies. Finally, SNPs were originally selected for this study to replicate known genotype-phenotype associations and to generalize them to diverse populations. A comprehensive set of genome-wide “agnostic” SNPs may uncover additional pleiotropic or novel genotype-phenotype relationships not tested here.

Despite the the limitations present for this PheWAS, there are multiple strengths within our study. We have had the opportunity to perform a PheWAS of substantial size with an unprecedented diversity of high quality phenotypic measurements and traits, across multiple races/ethnicities. In addition, because of this PheWAS was conducted across multiple independent studies, we were able to identify the most robust genotype-phenotype relationships across studies

### GALNT2, rs2144300, Coded Allele C

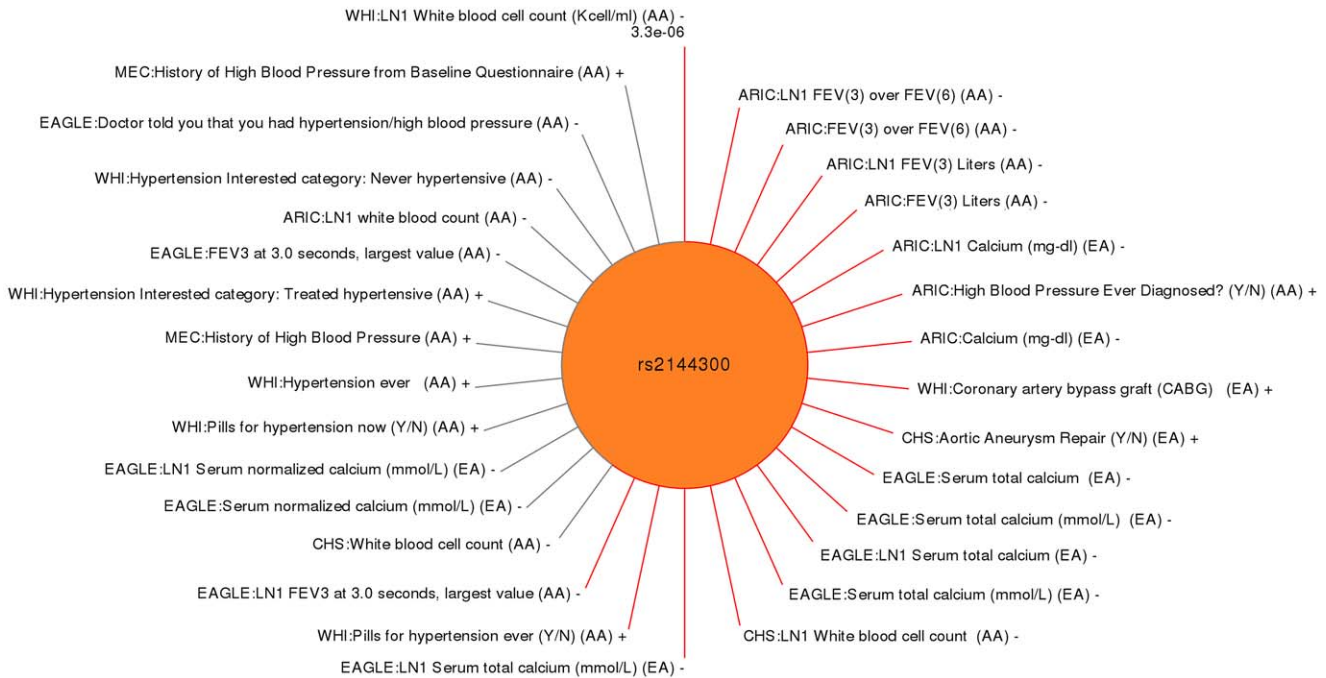

**Figure 5. PheWAS associations for rs2144300 within GALNT2.** The previously published associations for this SNP were with triglyceride and HDL cholesterol levels. Genotype-phenotype associations are plotted clockwise starting at top for the association with the smallest p-value. The length of the line corresponds to  $-\log_{10}(p\text{-value})$ , the longer the line the more significant the result. The study race/ethnicity/and phenotype for each tests of association are listed. Red lines represent associations at  $p < 0.01$ , and results with  $p < 0.05$  are also plotted in grey to show trends for additional phenotypes. The novel PheWAS phenotypes significantly associated with this SNP varied, including white blood cell counts, forced vital capacity at three seconds (FEV3), and serum calcium levels.  
doi:10.1371/journal.pgen.1003087.g005

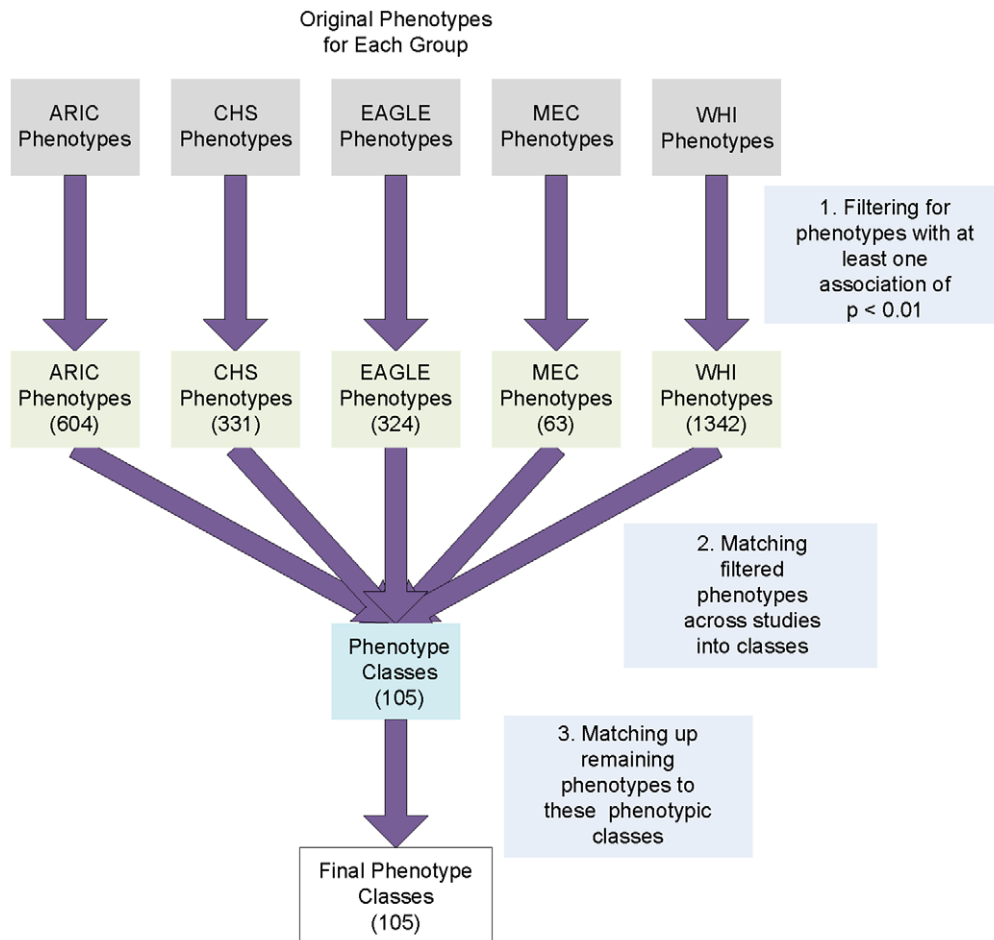

**Figure 6. Workflow for phenotype matching, to develop the 105 phenotype classes.** A MySQL database was used to filter the data from five studies for any results with  $p < 0.01$  to generate lists of the unique phenotypes for each individual PAGE study. The number of phenotypes that passed this significance threshold for each of the four groups was 604 (ARIC), 331 (CHS), 63 (MEC), 324 (EAGLE), 1,342 (WHI). Note that during the binning process, a smaller number of phenotypes are listed in Figure 6 than the total number of phenotypes referred to in the manuscript for the actual associations, in the phenotype matching process we only took into account distinct phenotypes regardless of whether or not they were transformed or untransformed or if they were categorical phenotypes binned into case/control phenotypes. Next, resulting phenotypes were then manually matched up between ARIC, CHS, MEC, EAGLE and WHI using and knowledge about the phenotypes and the known focus of specific PAGE study questions (such as arterial measurements including degree of arterial stenosis). In the last step, phenotypes from all studies, regardless of significance from genotype-phenotype tests of association, were matched to the already-defined phenotype classes using the criteria described above.

doi:10.1371/journal.pgen.1003087.g006

## Conclusion

This initial PheWAS within PAGE has presented challenges in terms of generating high-throughput tests of association across large epidemiologic studies as well as the synthesis of the resulting data and its eventual interpretation. Even with these limitations, this PheWAS demonstrates the utility of investigating the relationship between genetic variation and an extensive range of phenotypes by validating known genotype-phenotype associations as well as identifying novel genotype-phenotype associations, revealing complex phenotypic relationships and perhaps actual pleiotropy. The utility of this hypothesis-generating approach will continue to improve over time as more samples, variants, and phenotypes/traits across diverse populations are available for study in PAGE and other genomic resources. Larger, richer datasets coupled with methods development promise to more fully reveal the complex nature of genetic variation and its relationship with human diseases and traits.

## Methods

### Study Populations

All studies were approved by Institutional Review Boards at their respective sites (details are given in Text S1). The Population Architecture using Genomics and Epidemiology (PAGE) study includes the following epidemiologic collections: Atherosclerosis Risk in Communities (ARIC), Coronary Artery Risk in Young Adults (CARIDA), Cardiovascular Health Study (CHS), the Multiethnic Cohort (MEC), the National Health and Nutrition Examination Surveys (NHANES), Strong Heart Study (SHS), and Women's Health Initiative (WHI). For this PheWAS, data were available from ARIC, CHS, MEC, NHANES III, NHANES 1999–2002, and WHI (Table 1). The PAGE study design is described in Matise et al [26] and the PAGE PheWAS study design is described in Pendergrass et al [1].

**Table 5.** Example phenotype-classes and binned subphenotypes within phenotype-classes.

| Phenotype Class | Study | Sub-phenotype binned within the phenotype-class                                                                  |
|-----------------|-------|------------------------------------------------------------------------------------------------------------------|
| Asthma          | ARIC  | Asthma ever diagnosed?                                                                                           |
| Asthma          | ARIC  | Chest wheeze, whistle alot?                                                                                      |
| Asthma          | ARIC  | Chest wheeze, whistle, otherwise?                                                                                |
| Asthma          | ARIC  | Age at 1st wheezing attack                                                                                       |
| Asthma          | ARIC  | Age asthma started                                                                                               |
| Asthma          | ARIC  | Age asthma stopped                                                                                               |
| Asthma          | ARIC  | Short of breath wheezing attack?                                                                                 |
| Asthma          | CHS   | Inhaled steroids for asthma                                                                                      |
| Asthma          | CHS   | Asthma confirmed by doctor                                                                                       |
| Asthma          | CHS   | Current asthma diagnosis by doctor                                                                               |
| Asthma          | EAGLE | Doctor ever told you had: asthma                                                                                 |
| Asthma          | MEC   | Asthma: History of Asthma, Hayfever, Skin Allergy, Food Allergy or Any Other Allergy from Baseline Questionnaire |
| CRP             | CHS   | C-reactive protein, adjusted original values (mg/l)                                                              |
| CRP             | CHS   | C-reactive protein, original values (mg/l)                                                                       |
| CRP             | EAGLE | Serum C-reactive protein (mg/dL)                                                                                 |
| Hemoglobin      | ARIC  | Hemoglobin                                                                                                       |
| Hemoglobin      | CHS   | hemoglobin (g/dl)                                                                                                |
| Hemoglobin      | EAGLE | Hemoglobin (g/dL)                                                                                                |
| Hemoglobin      | WHI   | Hemoglobin (gm/dl)                                                                                               |
| Hemoglobin      | EAGLE | Mean cell hemoglobin concentration                                                                               |
| Hemoglobin      | EAGLE | Mean cell hemoglobin: SI (pg)                                                                                    |

Presented below are examples of phenotypes binned into three phenotype classes, "Asthma", "BMI", and "CRP". Table S2 contains the complete list of matched phenotypes across studies within phenotype-classes, for all phenotype-classes used within this study. doi:10.1371/journal.pgen.1003087.t005

## SNP Selection and Genotyping

All SNPs considered for genotyping in PAGE were candidate gene or GWAS-identified variants for phenotypes and traits available in the epidemiologic collections accessed by PAGE study sites. Cohorts and surveys were genotyped using either commercially available genotyping arrays (Affymetrix 6.0, Illumina 370CNV BeadChip), and/or custom mid- and low-throughput assays (TaqMan, Sequenom, Illumina GoldenGate or BeadXpress). Quality control was implemented at each PAGE study site independently. Study specific genotyping details are described in Text S1.

In this PheWAS, data were available for SNPs previously associated with HDL-C, LDL-C, and triglycerides [27], body mass index, obesity [28], type 2 diabetes, glucose, insulin [29], and measures of inflammation (C-reactive protein), among other diseases/traits. A total of 83 SNPs overlapped across at least PAGE study sites: ten were specifically selected for body mass index traits replication, three for C-reactive protein, six for coronary/cardiac traits, three for gout/kidney, 41 for lipids, and 20 for type 2 diabetes. Table S1 lists these SNPs, along with references reporting phenotypic associations from the NHGRI GWAS catalog [30] and the open access database of GWAS results of Johnson et al. 2009 [31]. The NHGRI GWAS catalog was most recently accessed in October, 2011. If no references were available from either of those two sources, a PubMed search was performed to retrieve relevant citations.

## Statistical Methods

All tests of association were performed independently by each PAGE study site using the following analysis protocol: Linear or

logistic regressions were performed for continuous or categorical dependent variables, respectively, assuming an additive genetic model (0, 1, or 2 copies of the coded allele). For variables with multiple categories, binning was used to create new variables of the form "A versus not A" for each category, and logistic regression was used to model the new binary variable. Linear regressions were repeated following a  $y$  to  $\log(y+1)$  transformation of the response variable with +1 added to all continuous measurements before transformation to prevent variables recorded as zero from being omitted from analysis. All analyses were stratified by race-ethnicity.

Test of association were calculated for the number of SNPs and phenotypes listed in Table 1. The software used to calculate the associations for each study was as follows: ARIC (StatSoftware), CHS (R [32]), MEC (SAS), MEC (SAS v9.2), WHI (R), EAGLE (SAS v9.2 using the Analytic Data Research by Email (ANDRE) portal of the CDC Research Data Center in Hyattsville, MD).

All association results from the tests of association were reported in standardized templates designed by the PAGE coordinating center to facilitate data sharing. All results were then imported into a relational database (MySQL). The database was also used to match previously reported GWAS data with the SNPs analyzed in this study.

## Plotting Significant Results

The software PheWAS-View was developed for data visualization of the PheWAS results as well as for plotting "Sun Plots" [33]. Synthesis-View [34,35] was also used to present results within this manuscript. Both software packages are freely available software for academic users: <http://ritchielab.psu.edu/ritchielab/software>,



and can be used with a web interface at: <http://visualization.ritchielab.psu.edu/>.

## Matching Phenotypes

A total of 105 phenotype-classes were developed to manually match related phenotypes across studies. To bin related phenotypes into classes the following steps were used as visualized in Figure 6: First, using a MySQL database, the data from EAGLE, MEC, CHS, ARIC, and WHI were independently filtered for any tests of association results at  $p < 0.01$ , and then lists of the unique phenotypes for each individual PAGE study were generated. The number of phenotypes that passed this significance threshold for each of the four groups was 604 (ARIC), 331 (CHS), 63 (MEC), 324 (EAGLE), 1,342 (WHI). Resulting phenotypes were then manually matched up between ARIC, CHS, MEC, EAGLE and WHI using knowledge about the phenotypes and the known focus of specific PAGE study survey questions (such as bone fracture questions used primarily for collecting information about osteoporosis). For some phenotypes, the specific phenotype existed clearly across more than one PAGE study, such as for the phenotype “Hemoglobin”, where hemoglobin measurements were present for ARIC, CHS, EAGLE, and WHI. Other groups of phenotypes that fell within similar phenotypic domains but were not represented in the same form across studies were also collected into phenotype classes. One example is the phenotypes grouped together for the phenotype class of “Allergy”. EAGLE collected specific quantitative data from allergy skin testing and had survey questions about the presence of allergies in participants. ARIC and MEC did not have skin allergy testing, but did have survey questions about the presence of allergies. Thus these allergy phenotypes were grouped together. Finally, phenotypes from all studies, regardless of significance from genotype-phenotype tests of association, were matched to the already-defined phenotype classes using the criteria described above. A phenotype that matched a phenotype class but was not associated with a SNP at the significance threshold of  $p < 0.01$  for a single study would still be included in the phenotype-class list. Using these criteria, a second curator reviewed the resultant phenotypes and phenotype classes for consistency and accuracy. To provide examples of the phenotype-classes, and which subphenotypes were matched with phenotype-classes, we show three phenotype-class examples in Table 5, and Table S2 contains the matched phenotypes across studies within the phenotype-classes for all phenotype-classes used within this study.

It is important to note resources that can be used for further investigation of the phenotypes listed in Table S2, as well as in the results presented in this paper. The following study websites contain additional information about all collected study information, including how those phenotypes were collected:

- ARIC <http://www.csc.c.unc.edu/aric/>
- CHS <http://www.chs-nhlbi.org/CHSData.htm>, [https://biolincc.nhlbi.nih.gov/static/studies/chs/Other\\_Documents.htm](https://biolincc.nhlbi.nih.gov/static/studies/chs/Other_Documents.htm)
- WHI <https://cleo.whi.org/data/Pages/home.aspx>
- EAGLE [http://www.cdc.gov/nchs/nhanes/nhanes\\_questionnaires.htm/](http://www.cdc.gov/nchs/nhanes/nhanes_questionnaires.htm/)
- MEC [http://www.crch.org/multiethniccohort/mec\\_questionnaires.htm](http://www.crch.org/multiethniccohort/mec_questionnaires.htm)

## References

1. Pendergrass SA, Brown-Gentry K, Dudek SM, Torstenson ES, Ambite JL, et al. (2011) The use of phenome-wide association studies (PheWAS) for exploration of

## Criteria for Significance of Association

After creating phenotype-classes, significant PheWAS tests of association for single genotype-phenotype associations across PAGE studies were identified using a database query. Our criteria for considering a PheWAS test of association significant included a threshold of  $p < 0.01$  observed in two or more PAGE studies for the same SNP, phenotype class, and race/ethnicity and consistent direction of effect.

A total of 111 PheWAS tests of association met our criteria for significance (Table S3). Significant results were then binned based on class of association: known, related, and novel. In this PheWAS, *Known Associations* are positive controls and represent previously reported genotype-phenotype associations. *Related Associations* are SNPs significantly associated in this PheWAS with phenotypes judged to be closely related to phenotypes among Known Associations found here and the literature. *Novel Associations* are significant PheWAS results where 1) the association does not match a known association and 2) the phenotype for the PheWAS association is not within a similar phenotypic domain as the phenotype of known association.

## Ethics Statement

All participating studies were approved by their respective IRBs, and all study participants signed informed consent forms.

## Supporting Information

**Table S1** The list of all SNPs available for two or more sites in this study, arranged by previously associated phenotypes. (XLSX)

**Table S2** A list of the study level phenotypes, the study from which the phenotype is available, and the phenotype-class for each phenotype that overlapped with another study. (XLSX)

**Table S3** The expanded results for the 111 PheWAS associations identified in this study. (XLSX)

**Table S4** The 52 PheWAS results that replicated previously published genotype-phenotype associations. (XLSX)

**Text S1** Information on study design, phenotype measurement, and genotyping for each study. (DOCX)

## Acknowledgments

The PAGE consortium thanks the staff and participants of all PAGE studies for their important contributions.

## Author Contributions

Conceived and designed the experiments: SAP CK SB DCC MDR JLA CLA ED MDF CAH LAH C-NH RDJ LLM TCM KRM LM AR. Performed the experiments: SAP KB-G SD AF EST RG SB YL SLP. Analyzed the data: SAP KB-G SD AF EST RG SB YL SLP RW. Contributed reagents/materials/analysis tools: SAP SD AF EST RG SB GH CK LRW YL PB SLP. Wrote the paper: SAP JLA CLA SB PB ED MDF CAH GH LAH C-NH RDJ CK LLM YL SLP TCM KRM LM AR RW LRW DCC MDR. Developed the software for the plots in this publication: SAP SD.

novel genotype-phenotype relationships and pleiotropy discovery. Genetic epidemiology 35: 410–422.

2. McCarty CA, Chisholm RL, Chute CG, Kullo JJ, Jarvik GP, et al. (2011) The eMERGE Network: a consortium of biorepositories linked to electronic medical records data for conducting genomic studies. *BMC medical genomics* 4: 13.
3. Denny JC, Ritchie MD, Basford MA, Pulley JM, Bastarache L, et al. (2010) PheWAS: demonstrating the feasibility of a phenome-wide scan to discover gene-disease associations. *Bioinformatics* 26: 1205–1210.
4. Collins FS (2004) The case for a US prospective cohort study of genes and environment. *Nature* 429: 475–477.
5. Collins FS, Manolio TA (2007) Merging and emerging cohorts: necessary but not sufficient. *Nature* 445: 259.
6. Willett WC, Blot WJ, Colditz GA, Folsom AR, Henderson BE, et al. (2007) Merging and emerging cohorts: not worth the wait. *Nature* 445: 257–258.
7. Matisse TC, Ambite JL, Buyske S, Carlson CS, Cole SA, et al. (2011) The Next PAGE in Understanding Complex Traits: Design for the Analysis of Population Architecture Using Genetics and Epidemiology (PAGE) Study. *American journal of epidemiology* 174: 849–859.
8. Kathiresan S, Melander O, Guiducci C, Surti A, Burt NP, et al. (2008) Six new loci associated with blood low-density lipoprotein cholesterol, high-density lipoprotein cholesterol or triglycerides in humans. *Nature genetics* 40: 189–197.
9. Teslovich TM, Musunuru K, Smith AV, Edmondson AC, Stylianou IM, et al. (2010) Biological, clinical and population relevance of 95 loci for blood lipids. *Nature* 466: 707–713.
10. Patel RS, Su S, Neeland IJ, Ahuja A, Veledar E, et al. (2010) The chromosome 9p21 risk locus is associated with angiographic severity and progression of coronary artery disease. *Eur Heart J* 31: 3017–3023.
11. Helgadottir A, Thorleifsson G, Manolescu A, Gretarsdottir S, Blondal T, et al. (2007) A common variant on chromosome 9p21 affects the risk of myocardial infarction. *Science* 316: 1491–1493.
12. Sandhu MS, Waterworth DM, Debenham SL, Wheeler E, Papadakis K, et al. (2008) LDL-cholesterol concentrations: a genome-wide association study. *Lancet* 371: 483–491.
13. Willer CJ, Sanna S, Jackson AU, Scuteri A, Bonnycastle LL, et al. (2008) Newly identified loci that influence lipid concentrations and risk of coronary artery disease. *Nature genetics* 40: 161–169.
14. Wallace C, Newhouse SJ, Braund P, Zhang F, Tobin M, et al. (2008) Genome-wide association study identifies genes for biomarkers of cardiovascular disease: serum urate and dyslipidemia. *American journal of human genetics* 82: 139–149.
15. Samani NJ, Erdmann J, Hall AS, Hengstenberg C, Mangino M, et al. (2007) Genomewide association analysis of coronary artery disease. *N Engl J Med* 357: 443–453.
16. Zeggini E, Scott LJ, Saxena R, Voight BF, Marchini JL, et al. (2008) Meta-analysis of genome-wide association data and large-scale replication identifies additional susceptibility loci for type 2 diabetes. *Nature genetics* 40: 638–645.
17. Jiang CQ, Lam TH, Liu B, Lin JM, Yue XJ, et al. (2010) Interleukin-6 receptor gene polymorphism modulates interleukin-6 levels and the metabolic syndrome: GBCS-CVD. *Obesity (Silver Spring)* 18: 1969–1974.
18. Zeggini E, Weedon MN, Lindgren CM, Frayling TM, Elliott KS, et al. (2007) Replication of genome-wide association signals in UK samples reveals risk loci for type 2 diabetes. *Science* 316: 1336–1341.
19. Saxena R, Voight BF, Lyssenko V, Burt NP, de Bakker PI, et al. (2007) Genome-wide association analysis identifies loci for type 2 diabetes and triglyceride levels. *Science* 316: 1331–1336.
20. Salonen JT, Uimari P, Aalto JM, Pirskanen M, Kaikkonen J, et al. (2007) Type 2 diabetes whole-genome association study in four populations: the DiaGen consortium. *American journal of human genetics* 81: 338–345.
21. Reiner AP, Lettre G, Nalls MA, Ganesh SK, Mathias R, et al. (2011) Genome-wide association study of white blood cell count in 16,388 African Americans: the continental origins and genetic epidemiology network (COGENT). *PLoS Genet* 7: e1002108. doi:10.1371/journal.pgen.1002108
22. Crosslin DR, McDavid A, Weston N, Nelson SC, Zheng X, et al. (2011) Genetic variants associated with the white blood cell count in 13,923 subjects in the eMERGE Network. *Hum Genet*.
23. Wellcome Trust Case Control Consortium (2007) Genome-wide association study of 14,000 cases of seven common diseases and 3,000 shared controls. *Nature* 447: 661–678.
24. Lettre G, Palmer CD, Young T, Ejebe KG, Allayee H, et al. (2011) Genome-wide association study of coronary heart disease and its risk factors in 8,090 African Americans: the NHLBI CARE Project. *PLoS Genet* 7: e1001300. doi:10.1371/journal.pgen.1001300
25. Isomaa B, Almgren P, Tuomi T, Forsen B, Lahti K, et al. (2001) Cardiovascular morbidity and mortality associated with the metabolic syndrome. *Diabetes care* 24: 683–689.
26. Matisse TC, Ambite JL, Buyske S, Carlson CS, Cole SA, et al. (2011) The Next PAGE in Understanding Complex Traits: Design for the Analysis of Population Architecture Using Genetics and Epidemiology (PAGE) Study. *American journal of epidemiology* 174: 849–859.
27. Dumitrescu L, Carty CL, Taylor K, Schumacher FR, Hindorf LA, et al. (2011) Genetic Determinants of Lipid Traits in Diverse Populations from the Population Architecture using Genomics and Epidemiology (PAGE) Study. *PLoS Genet* 7: e1002138. doi:10.1371/journal.pgen.1002138
28. Fesinmeyer MD, North KE, Ritchie MD, Lim U, Franceschini N, et al. (2012) Genetic Risk Factors for BMI and Obesity in an Ethnically Diverse Population: Results From the Population Architecture Using Genomics and Epidemiology (PAGE) Study. *Obesity (Silver Spring)*.
29. Haiman CA, Fesinmeyer MD, Spencer KL, Buzkova P, Voruganti VS, et al. (2012) Consistent Directions of Effect for Established Type 2 Diabetes Risk Variants Across Populations: The Population Architecture using Genomics and Epidemiology (PAGE) Consortium. *Diabetes* 61: 1642–1647.
30. Hindorf LA, Sethupathy P, Junkins HA, Ramos EM, Mehta JP, et al. (2009) Potential etiologic and functional implications of genome-wide association loci for human diseases and traits. *Proc Natl Acad Sci U S A* 106: 9362–9367.
31. Johnson AD, O'Donnell CJ (2009) An open access database of genome-wide association results. *BMC Med Genet* 10: 6.
32. Team TRDC (2009) R: A Language and Environment for Statistical Computing.
33. Pendergrass SA, Dudek S, Crawford DC, Ritchie MD (2012) Visually integrating and exploring high throughput Phenome-Wide Association (PheWAS) results using PheWAS-View. *BioData Min* 5: 5.
34. Pendergrass SA, Dudek SM, Crawford DC, Ritchie MD (2010) Synthesis-View: visualization and interpretation of SNP association results for multi-cohort, multi-phenotype data and meta-analysis. *BioData Min* 3: 10.
35. Pendergrass S, Dudek SM, Roden DM, Crawford DC, Ritchie MD (2011) Visual integration of results from a large DNA biobank (biobu) using synthesis-view. *Pac Symp Biocomput*: 265–275.
36. (1989) The Atherosclerosis Risk in Communities (ARIC) Study: design and objectives. The ARIC Investigators. *American journal of epidemiology* 129: 687–702.
37. Fried LP, Borhani NO, Enright P, Furberg CD, Gardin JM, et al. (1991) The Cardiovascular Health Study: design and rationale. *Ann Epidemiol* 1: 263–276.
38. Centers for Disease Control and Prevention NCHS (1994) Plan and operation of the Third National Health and Nutrition Examination Survey, 1988–94. Series 1: programs and collection procedures. *Vital Health Stat* 1: 1–407.
39. Kolonel LN, Henderson BE, Hankin JH, Nomura AM, Wilkens LR, et al. (2000) A multiethnic cohort in Hawaii and Los Angeles: baseline characteristics. *American journal of epidemiology* 151: 346–357.
40. (1998) Design of the Women's Health Initiative clinical trial and observational study. The Women's Health Initiative Study Group. *Control Clin Trials* 19: 61–109.
